# Supplementary material
Source: publisher figshare collection journal article supplement (https://gsapubs.figshare.com/articles/dataset/_/13619120)
Supplement: Supplementary file 2 [file 1]

Archive with 3 entries (3 files):
- GS2326_SuppMat1.pdf
- GS2326_SuppMat2.xlsx
- GS2326_SuppMat3.xlsx
