# Supplementary material
Source: publisher figshare collection journal article supplement (https://gsapubs.figshare.com/articles/dataset/_/13619120)
Supplement: Supplementary file 2 [file 1 › GS2326_SuppMat2.xlsx]

## Sheet: Major Elements
Protolith affiliation and tectonometamorphic evolution of the Gurla Mandhata core complex, NW Nepal Himalaya
Godin et al. Geosphere
Supplemental File 2: Geochemistry analyses
	Analyte	SiO2	Al2O3	Fe2O3	MgO	CaO	Na2O	K2O	TiO2	P2O5	MnO	Cr2O3	Ba	Ni	Sc	LOI	TOT/C	TOT/S
	Unit	%	%	%	%	%	%	%	%	%	%	%	ppm	ppm	ppm	%	%	%
	MDL	0.01	0.01	0.04	0.01	0.01	0.01	0.01	0.01	0.01	0.01	0.002	1	20	1	-5.1	0.02	0.02
MA-01		73.09	13.81	2.52	2.98	0.16	0.41	4.79	0.19	0.12	0.01	<0.002	271	<20	3	1.8	0.02	<0.02
MA-02		72.16	14.5	4.11	1.04	0.46	2.24	2.84	0.66	0.03	0.06	0.009	558	<20	11	1.7	0.12	<0.02
MA-03		94.39	2.55	1.08	0.27	0.13	0.14	0.66	0.19	0.08	<0.01	0.002	49	<20	3	0.5	<0.02	<0.02
MA-06		72.85	11.81	5.88	1.88	0.31	0.8	4.18	0.66	0.08	0.03	0.008	647	<20	12	1.3	0.03	0.07
MA-11		62.25	15.99	7.5	3.92	1.54	2.15	4.06	0.83	0.16	0.11	0.018	491	52	18	1.3	0.02	<0.02
MA-12		72.15	12.92	5.34	2.99	0.53	1.22	2.7	0.69	0.09	0.05	0.012	912	21	13	1.1	<0.02	0.03
MA-13		69.94	12.71	5.58	2.73	1.37	2.32	3.31	0.7	0.12	0.08	0.014	464	34	13	0.9	<0.02	<0.02
MA-14		72.99	11.46	4.99	2.23	3.09	1.26	1.9	0.63	0.21	0.11	0.013	513	39	11	0.9	<0.02	<0.02
MA-20a		69.22	12.98	5.97	2.89	3.02	0.66	3.1	0.68	0.13	0.1	0.011	416	41	13	1.1	<0.02	<0.02
MA-21b		72.38	14.16	3.93	0.85	0.65	2.07	3.9	0.53	0.09	0.05	0.005	445	<20	9	1.2	0.02	<0.02
MA-21c		73.42	15.43	1.9	0.33	0.73	3.02	3.8	0.18	0.12	0.05	<0.002	164	<20	5	1	<0.02	<0.02
MA-22b		70.62	13.25	3.28	1.73	3.14	1.62	4.48	0.64	0.16	0.07	0.01	484	24	11	0.8	0.02	<0.02
MA-24a		69.18	13.06	6.09	2.71	2.46	1.95	2.76	0.71	0.14	0.1	0.012	679	31	14	0.6	<0.02	<0.02
MA-26		68.12	17.32	4.44	0.79	0.34	1.85	4.35	0.6	0.05	0.1	0.006	763	<20	14	1.8	0.02	<0.02
MA-27		53.82	14.69	11.24	5.86	9.39	1.93	1.14	0.8	0.1	0.19	0.026	186	33	43	0.6	0.03	<0.02
MA-31		75.4	12.08	2.59	2	0.47	4.5	2.02	0.26	0.03	0.02	<0.002	172	<20	6	0.5	<0.02	<0.02
CY58		67.12	15.32	6.27	2.45	1.52	1	3.55	0.78	0.12	0.14	0.01	772	30	14	1.5		99.83
CY64		70.53	13.91	5.01	1.1	0.53	1.89	4.5	1.3	0.05	0.09	0.013	1028	21	12	0.7		99.79
CY69		73.95	14.43	1.43	0.4	1.19	3.32	4.04	0.18	0.08	0.02	<0.002	491	<20	3	0.8		99.93
HK105B		67.95	15.17	4.42	3.61	0.2	0.21	5.47	0.52	0.14	0.02	<0.002	819	<20	9	2		99.83
HK115		71.92	15.06	2.49	1.17	0.74	1.59	4.87	0.23	0.07	0.02	<0.002	339	<20	5	1.7		99.89
HK09		73.82	14.32	1.01	0.23	1.14	3.2	5.5	0.13	0.06	<0.01	<0.002	328	<20	2	0.5		99.95

## Sheet: Minor Elements
	Analyte	Be	Co	Cs	Ga	Hf	Nb	Rb	Sn	Sr	Ta	Th	U	V	W	Zr
	Unit	ppm	ppm	ppm	ppm	ppm	ppm	ppm	ppm	ppm	ppm	ppm	ppm	ppm	ppm	ppm
	MDL	1	0.2	0.1	0.5	0.1	0.1	0.1	1	0.5	0.1	0.2	0.1	8	0.5	0.1
MA-01		2	2.1	31.3	17.6	3.2	11.6	373.4	12	11.4	1.2	34.7	10.8	<8	2.3	89.8
MA-02		4	7.7	7.7	16.2	7.4	11.8	102.6	3	147.9	1	13	3	67	1.9	249.4
MA-03		1	1.3	2.2	4.1	5.2	4.6	37.5	6	6.7	0.4	4.8	1.4	18	1.4	182.4
MA-06		2	5.5	13.7	13.1	7.2	13	233.8	5	39.1	1.1	23.9	3	74	4.7	242
MA-11		3	18.2	51	20.1	5.6	12.1	187.1	5	84.4	1	16.6	2.9	124	1.8	186
MA-12		2	10.5	12.3	16.8	7.1	12.3	118.2	3	68.6	0.9	19.2	3.8	82	1.2	247.2
MA-13		3	12.8	9.6	15.6	7.3	10.8	136.8	5	73	1	15.6	3.4	97	2.5	252.9
MA-14		2	11.6	7.3	13.5	6.4	10.7	83.3	2	163.3	1.1	12.3	2.6	78	0.8	217.2
MA-20a		3	15.1	10	15.9	7.8	11.8	158.5	4	65.3	1.2	17.3	2.6	144	1.7	267.4
MA-21b		4	8.4	28.7	22.6	6.2	13.9	237	9	81.3	1	14.1	6.5	59	5	210.7
MA-21c		18	2.2	35.9	22.7	2.6	14.6	249.9	15	58.8	3.1	7.7	4.4	16	7.3	68
MA-22b		3	5.6	17.9	15.4	6.9	12.7	151.3	5	61.1	1.1	19	3.6	68	2.8	232.1
MA-24a		3	15	23.2	15	6.3	11.3	160.5	4	87.9	1	14.5	2.6	104	1.5	218
MA-26		4	7.2	15.7	22	6.9	13.3	176.6	5	67.1	1.2	18.2	2.8	64	6	220.6
MA-27		2	31.8	1	14.8	2.9	12	38.9	1	135.9	0.8	7.3	1.9	210	0.8	98.3
MA-31		4	1	5.9	17.3	10.4	12.6	117.6	7	42.8	1.1	40.4	10.7	<8	1.2	323.2
CY58		4	15	5.9	20.5	7.6	15.2	162.1	5	112.9	1.1	21.7	3.2	90	3.1	274.4
CY64		2	13.7	15.1	16.4	15.2	30.8	239.7	5	207.2	3.2	26.6	4.6	82	2.4	600.4
CY69		6	1.8	4.8	16.8	2.9	6.6	179.6	6	151.2	0.5	12.1	4.1	13	<0.5	99.5
HK105B		1	6.5	11	19.7	8.1	15.1	300.3	7	9.5	1.6	33.8	9.2	27	4.8	297.9
HK115		4	2.7	11.3	19.1	4.9	11.5	290.6	12	30.3	1.3	30.6	20.1	11	3.4	168.8
HK09		2	1.2	4.2	13.2	1.9	6.9	212.5	2	93	0.7	13.7	3.3	<8	<0.5	54.7

## Sheet: Rare Earth Elements
	Analyte	Y	La	Ce	Pr	Nd	Sm	Eu	Gd	Tb	Dy	Ho	Er	Tm	Yb	Lu
	Unit	ppm	ppm	ppm	ppm	ppm	ppm	ppm	ppm	ppm	ppm	ppm	ppm	ppm	ppm	ppm
	MDL	0.1	0.1	0.1	0.02	0.3	0.05	0.02	0.05	0.01	0.05	0.02	0.03	0.01	0.05	0.01
MA-01		10.3	42.8	91.7	10.61	37.8	7.4	0.33	5.04	0.58	2.44	0.33	0.78	0.1	0.64	0.09
MA-02		33.4	35.7	71.2	8.13	30.3	5.76	1.05	5.21	0.87	5.66	1.24	3.74	0.53	3.57	0.57
MA-03		10.1	10.2	20.6	2.34	8.7	1.76	0.22	1.76	0.29	1.76	0.34	1.04	0.15	0.97	0.16
MA-06		21.2	47.7	94.4	10.73	39.6	7.25	1.43	5.91	0.86	4.38	0.85	2.3	0.29	1.84	0.29
MA-11		32.8	38.9	77.4	9.05	34.3	6.63	1.29	6.11	0.96	5.65	1.18	3.46	0.48	3.1	0.48
MA-12		26.4	42.2	85.1	9.55	35.4	6.39	1.25	5.74	0.85	4.87	0.9	2.76	0.38	2.51	0.41
MA-13		26	36.5	75.6	8.59	33	6.04	1.11	5.65	0.84	4.91	0.98	3	0.41	2.73	0.41
MA-14		27.4	30.4	62.5	7.16	26.6	5.48	1.25	5.14	0.81	5.13	0.93	2.88	0.39	2.51	0.39
MA-20a		24.8	34.4	70.7	8.03	29.6	5.75	0.98	5.44	0.8	4.6	0.91	2.54	0.34	2.28	0.36
MA-21b		34.6	31.4	66.6	7.35	26.5	5.37	0.71	6.04	1.03	6.19	1.22	3.39	0.45	2.84	0.46
MA-21c		18.2	13.7	29.8	3.51	13	3.17	0.38	3.43	0.65	3.87	0.67	1.92	0.26	1.64	0.25
MA-22b		28.7	39.9	83.6	9.14	33.8	6.3	1.37	6.01	0.92	5.06	1.05	2.91	0.4	2.68	0.41
MA-24a		29	33.4	70	7.87	29.2	5.6	1.15	5.32	0.84	5.13	1.13	3.48	0.5	3.23	0.51
MA-26		42.9	44.1	94.8	10.9	42.5	8.19	1.42	8.06	1.22	7.6	1.48	4.33	0.6	4.15	0.66
MA-27		23.6	19.5	39.9	4.47	16.5	3.45	0.99	3.72	0.64	4.29	0.91	2.65	0.38	2.47	0.41
MA-31		60.6	71.4	147.4	16.52	59.7	11.37	0.93	10.64	1.71	11.08	2.33	6.92	0.92	5.74	0.91
CY58		31.9	45.8	88.2	9.78	34.7	6.85	1.25	6.25	0.98	5.68	1.19	3.45	0.51	3.33	0.51
CY64		58.9	59.5	114.4	12.53	43.6	8.3	1.18	7.58	1.25	8.16	1.99	6.62	1	6.58	0.97
CY69		11.7	24.6	49	5.53	20.1	4.44	0.84	3.82	0.5	2.45	0.42	1.06	0.13	0.91	0.13
HK105B		30.9	64.5	125.3	13.9	48	8.95	1.05	7.76	1.13	6.05	1.12	3.24	0.42	2.62	0.39
HK115		23.6	60.4	113.7	12.67	44	7.48	0.85	6.07	0.8	4.09	0.75	2.14	0.29	1.82	0.27
HK09		4.7	21	40.4	4.73	16.7	3.63	0.68	2.62	0.3	1.23	0.14	0.32	0.03	0.28	0.03
