# Supplementary material
Source: publisher figshare collection journal article supplement (https://gsapubs.figshare.com/articles/dataset/_/13619120)
Supplement: Supplementary file 2 [file 1 › GS2326_SuppMat3.xlsx]

## Sheet: PlotDat8
Source sheet	Sheet2	0.3	0.0552786	1	0.05555	0.00054	3	0.05716	0.00044
Plot name	Average6	41.7	0.0552786	2	0.05459	0.00039	4	0.05438	0.00037
Plot Type	15			5	0.05538	0.00041	IsoLine	IsoLine	IsoLine	IsoLine
1st free col	11			6	0.05542	0.00043
Sigma Level	2			7	0.05523	0.00035
Absolute Errs	TRUE			8	0.05537	0.00048
Symbol Type	1			9	0.05534	0.00046
Inverse Plot	FALSE			10	0.05521	0.00045
Color Plot	TRUE			11	0.05528	0.00049
3D plot	FALSE			12	0.05539	0.00049
Linear	FALSE			13	0.05525	0.00044
Data Range	K503:L543			14	0.05524	0.00054
Filled Symbols	FALSE			15	0.05537	0.00048
ConcAge	FALSE			16	0.05501	0.00059
ConcSwap	FALSE			17	0.05593	0.00061
1st Symbol-row	1			18	0.05499	0.0004
				19	0.05559	0.00056
				20	0.0553	0.0005
				21	0.05526	0.00049
				22	0.05519	0.00039
				23	0.05561	0.00049
				24	0.05507	0.00062
				25	0.05516	0.00068
				26	0.05528	0.0007
				27	0.05542	0.00051
				28	0.05518	0.00035
				29	0.05552	0.00039
				30	0.05484	0.00051
				31	0.05548	0.00036
				32	0.05513	0.00058
				33	0.05531	0.00045
				34	0.05521	0.00052
				35	0.05532	0.00036
				36	0.05526	0.00047
				37	0.05553	0.00052
				38	0.05496	0.00063
				39	0.05543	0.0004
				40	0.05514	0.00033
				41	0.05543	0.00043
				IsoLine	IsoLine	IsoLine	IsoLine

## Sheet: PlotDat9
Source sheet	Sheet2	0.3	0.0571311	1	0.05856	0.00113823
Plot name	Average7	38.7	0.0571311	2	0.05603	0.00108712
Plot Type	15			3	0.05665	0.00107163
1st free col	8			4	0.05752	0.00107854
Sigma Level	2			5	0.05793	0.00113511
Absolute Errs	FALSE			6	0.05698	0.00109042
Symbol Type	1			7	0.05693	0.00107377
Inverse Plot	FALSE			8	0.05728	0.00109031
Color Plot	TRUE			9	0.05761	0.00109596
3D plot	FALSE			10	0.05726	0.00113122
Linear	FALSE			11	0.05701	0.00110392
Data Range	K462:K500,M462:M500			12	0.0574	0.00111319
Filled Symbols	FALSE			13	0.05704	0.00111215
ConcAge	FALSE			14	0.05748	0.00110159
ConcSwap	FALSE			15	0.0586	0.00127946
1st Symbol-row	1			16	0.05871	0.00113823
				17	0.05723	0.00109991
				18	0.05686	0.00109358
				19	0.05742	0.00111095
				20	0.05774	0.00111125
				21	0.0587	0.00111986
				22	0.05756	0.00113891
				23	0.05819	0.00113189
				24	0.05681	0.00112095
				25	0.0563	0.00107092
				26	0.05648	0.00108447
				27	0.05583	0.00107073
				28	0.05669	0.00109326
				29	0.05721	0.0011125
				30	0.05745	0.00112686
				31	0.05812	0.00110468
				32	0.05729	0.00110094
				33	0.05647	0.00106856
				34	0.0558	0.00105181
				35	0.05577	0.0010513
				36	0.05627	0.00109123
				37	0.05691	0.00109443
				38	0.05623	0.00108538
				IsoLine	IsoLine	IsoLine	IsoLine

## Sheet: PlotDat10
Source sheet	Sheet2	0.3	0.0571321	1	0.05856	0.00118979
Plot name	Average8	38.7	0.0571321	2	0.05603	0.00113653
Plot Type	15			3	0.05665	0.00112282
1st free col	8			4	0.05752	0.00113095
Sigma Level	2			5	0.05793	0.00118572
Absolute Errs	FALSE			6	0.05698	0.00114134
Symbol Type	1			7	0.05693	0.00112536
Inverse Plot	FALSE			8	0.05728	0.00114176
Color Plot	TRUE			9	0.05761	0.00114773
3D plot	FALSE			10	0.05726	0.00118085
Linear	FALSE			11	0.05701	0.00115429
Data Range	K462:K500,M462:M500			12	0.0574	0.00116383
Filled Symbols	FALSE			13	0.05704	0.00116222
ConcAge	FALSE			14	0.05748	0.00115288
ConcSwap	FALSE			15	0.0586	0.0013256
1st Symbol-row	1			16	0.05871	0.00119004
				17	0.05723	0.00115085
				18	0.05686	0.00114414
				19	0.05742	0.00116172
				20	0.05774	0.00116257
				21	0.0587	0.00117247
				22	0.05756	0.00118872
				23	0.05819	0.00118308
				24	0.05681	0.00117025
				25	0.0563	0.00112152
				26	0.05648	0.00113478
				27	0.05583	0.00112052
				28	0.05669	0.00114355
				29	0.05721	0.00116285
				30	0.05745	0.001177
				31	0.05812	0.00115696
				32	0.05729	0.00115193
				33	0.05647	0.00111956
				34	0.0558	0.0011024
				35	0.05577	0.00110185
				36	0.05627	0.00114088
				37	0.05691	0.00114505
				38	0.05623	0.00113521
				IsoLine	IsoLine	IsoLine	IsoLine

## Sheet: PlotDat11
Source sheet	Sheet2	0.3	0.0808056	1	0.081	0.0019	35	0.0744	0.0014
Plot name	Average9	40.7	0.0808056	2	0.0812	0.00088	40	0.0745	0.001
Plot Type	15			3	0.0776	0.00078	IsoLine	IsoLine	IsoLine	IsoLine
1st free col	11			4	0.08117	0.00092
Sigma Level	2			5	0.07963	0.00099
Absolute Errs	TRUE			6	0.0785	0.001
Symbol Type	1			7	0.077	0.001
Inverse Plot	FALSE			8	0.0806	0.0011
Color Plot	TRUE			9	0.0836	0.0014
3D plot	FALSE			10	0.0826	0.0013
Linear	FALSE			11	0.0807	0.0014
Data Range	S462:T501			12	0.0812	0.0014
Filled Symbols	FALSE			13	0.0829	0.0013
ConcAge	FALSE			14	0.0821	0.0017
ConcSwap	FALSE			15	0.0779	0.0018
1st Symbol-row	1			16	0.0773	0.0014
				17	0.078	0.0013
				18	0.0788	0.0018
				19	0.08229	0.00031
				20	0.0818	0.0016
				21	0.0795	0.002
				22	0.0808	0.0015
				23	0.082	0.0019
				24	0.0815	0.0017
				25	0.0824	0.00092
				26	0.0817	0.00099
				27	0.0811	0.001
				28	0.08092	0.00098
				29	0.0812	0.0012
				30	0.08174	0.00097
				31	0.0817	0.0011
				32	0.08131	0.00089
				33	0.08021	0.00092
				34	0.0767	0.0013
				36	0.0763	0.0011
				37	0.0815	0.0012
				38	0.0832	0.0015
				39	0.0757	0.0011
				IsoLine	IsoLine	IsoLine	IsoLine

## Sheet: PlotDat12
Source sheet	Sheet2	0.3	0.0250362	1	0.02479	0.0005	40	0.02644	0.00041
Plot name	Average10	40.7	0.0250362	2	0.0245	0.00028	IsoLine	IsoLine	IsoLine	IsoLine
Plot Type	15			3	0.02426	0.00026
1st free col	11			4	0.02483	0.00028
Sigma Level	2			5	0.02427	0.0003
Absolute Errs	TRUE			6	0.02447	0.00033
Symbol Type	1			7	0.02416	0.00035
Inverse Plot	FALSE			8	0.02465	0.00035
Color Plot	TRUE			9	0.0252	0.00037
3D plot	FALSE			10	0.02543	0.0004
Linear	FALSE			11	0.02522	0.00046
Data Range	Y462:Z501			12	0.02514	0.00042
Filled Symbols	FALSE			13	0.02592	0.00048
ConcAge	FALSE			14	0.02557	0.00054
ConcSwap	FALSE			15	0.0249	0.00057
1st Symbol-row	1			16	0.02555	0.00047
				17	0.02479	0.00043
				18	0.02482	0.00053
				19	0.02497	0.00017
				20	0.02455	0.00051
				21	0.02424	0.00053
				22	0.02497	0.00048
				23	0.02506	0.00058
				24	0.02491	0.00049
				25	0.02525	0.00028
				26	0.02536	0.00032
				27	0.02564	0.00037
				28	0.02536	0.00038
				29	0.02545	0.00035
				30	0.02531	0.00032
				31	0.02548	0.00035
				32	0.02491	0.00029
				33	0.02544	0.00032
				34	0.02572	0.00046
				35	0.02529	0.00049
				36	0.02522	0.00038
				37	0.02521	0.00038
				38	0.02603	0.00048
				39	0.02599	0.00036
				IsoLine	IsoLine	IsoLine	IsoLine

## Sheet: PlotDat13
Source sheet	Sheet2	0.3	0.0250201	1	0.02479	0.0005	7	0.02416	0.00035
Plot name	Average11	37.7	0.0250201	2	0.0245	0.00028	IsoLine	IsoLine	IsoLine	IsoLine
Plot Type	15			3	0.02426	0.00026
1st free col	11			4	0.02483	0.00028
Sigma Level	2			5	0.02427	0.0003
Absolute Errs	TRUE			6	0.02447	0.00033
Symbol Type	1			8	0.02465	0.00035
Inverse Plot	FALSE			9	0.0252	0.00037
Color Plot	TRUE			10	0.02543	0.0004
3D plot	FALSE			11	0.02522	0.00046
Linear	FALSE			12	0.02514	0.00042
Data Range	Y462:Z498			13	0.02592	0.00048
Filled Symbols	FALSE			14	0.02557	0.00054
ConcAge	FALSE			15	0.0249	0.00057
ConcSwap	FALSE			16	0.02555	0.00047
1st Symbol-row	1			17	0.02479	0.00043
				18	0.02482	0.00053
				19	0.02497	0.00017
				20	0.02455	0.00051
				21	0.02424	0.00053
				22	0.02497	0.00048
				23	0.02506	0.00058
				24	0.02491	0.00049
				25	0.02525	0.00028
				26	0.02536	0.00032
				27	0.02564	0.00037
				28	0.02536	0.00038
				29	0.02545	0.00035
				30	0.02531	0.00032
				31	0.02548	0.00035
				32	0.02491	0.00029
				33	0.02544	0.00032
				34	0.02572	0.00046
				35	0.02529	0.00049
				36	0.02522	0.00038
				37	0.02521	0.00038
				IsoLine	IsoLine	IsoLine	IsoLine

## Sheet: DATA
Protolith affiliation and tectonometamorphic evolution of the Gurla Mandhata core complex, NW Nepal Himalaya
Godin et al. Geosphere
Supplemental File 3: U-Th/Pb analyses
	Spot #	X	Y	comment		Pb ppm	U ppm	Th ppm	Th/U		Final207_206	2SE %	Final207_235	2SE %	Final206_238	2SE %	Rho		Final208_232	2SE %		FinalAge207_206	2 SE abs.	FinalAge207_235	2 SE abs.	FinalAge206_238	2 SE abs.	FinalAge208_232	2 SE abs.	%discordance			Ca_ppm_m44	Sr_ppm_m88	Y_ppm_m89	La_ppm_m139	Ce_ppm_m140	Pr_ppm_m141	Nd_ppm_m146	Sm_ppm_m147	Eu_ppm_m153	Tb_ppm_m159	Dy_ppm_m163	Ho_ppm_m165	Er_ppm_m166	Tm_ppm_m169	Yb_ppm_m172	Lu_ppm_m175
MA06_2_1	1	47040	59427	Good		165	8450	85700	8.30565		0.0699	2.38161	0.0365	3.12843	0.004	2.02855	0.648424		0.001263	2.24261		917	48.9246	36.4	1.13875	25.73	0.521945	25.52	0.572314	0.822884			9950	41.1	22900	111100	216000	25400	94300	18900	3120	1890	7720	1060	1540	146.5	482	55.1
MA06_2_2	2	47051	59435	Questionable		131.4	7640	70700	7.98913		0.0678	2.60381	0.0358	3.32353	0.003997	2.06544	0.621459		0.001265	2.25981		842	54.0188	35.7	1.1865	25.72	0.531231	25.56	0.577606	0.625978			8970		24300	118700	231000	25400	98500	18700	3120	1880	8260	1095	1587	150	488	56.8
MA06_2_3	3	47026	59433	Poor/Discordant		106.9	6690	59100	8.17261		0.0669	2.46578	0.03453	3.17441	0.003885	1.99921	0.629788		0.001245	2.31635		833	51.3805	34.46	1.0939	25	0.499801	25.14	0.58233	0.556881			9040		22200	110200	221000	26200	97000	18700	3130	1900	7660	1027	1525	154.8	527	60.2
MA06_2_4	4	47036	59441			99.5	6720	56800	8.01989		0.0653	2.54085	0.0334	3.23074	0.003847	1.99543	0.61764		0.00122	2.25068		768	53.3747	33.35	1.07745	24.75	0.49387	24.65	0.554793	0.40568			9820		23700	110900	233000	27500	93900	19240	3240	1900	7960	1085	1630	152.7	584	63.2
MA06_2_5	5	47047	59453			83.6	6350	49200	7.62777		0.0756	2.63509	0.0382	3.34869	0.003768	2.06641	0.617079		0.001181	2.29567		1066	52.8367	38	1.2725	24.25	0.501104	23.86	0.547747	1.63453			9870		23300	121100	230000	25000	86000	17400	2840	1710	7780	999	1494	144.8	521	61.6
MA06_2_6	6	46980	59416			87.1	6680	49680	7.39098		0.0661	2.53318	0.0348	3.2421	0.003903	2.02341	0.624106		0.001244	2.26394		793	52.9965	34.8	1.12825	25.11	0.508079	25.13	0.568927	0.0795862			8350		24500	113500	216000	25400	88300	19200	2880	1840	7850	1005	1500	150	495	59
MA06_2_7	7	46998	59427			68.7	6460	44700	6.88231		0.0694	2.58809	0.0323	3.31275	0.003463	2.06787	0.624216		0.001084	2.28019		893	53.2886	32.3	1.07002	22.28	0.460721	21.9	0.499361	1.73516			9520		22900	110900	224000	25200	95500	17700	3190	1690	7340	1039	1780	187	676	90.7
MA06_2_8	8	47014	59446			59.3	2660	41800	15.7978		0.072	2.91852	0.0332	3.58092	0.003321	2.07491	0.579433		0.001007	2.27852		970	59.3978	33.2	1.18887	21.37	0.443407	20.35	0.463679	5.01229			9480	70	23400	109300	225000	25000	95400	17300	2270	1670	6970	1075	1750	200	758	99.7
MA06_2_9	9	47030	59461			54.5	3230	38800	11.9531		0.073	2.85858	0.032	3.53357	0.003229	2.07716	0.587836		0.0010008	2.21794		1015	57.93	31.9	1.12721	20.78	0.431634	20.22	0.448468	2.76954			8840	41.8	22700	107800	221000	24700	92800	17700	1980	1560	6870	1005	1730	185	768	89.7
MA06_2_10	10	47034	59479			34.3	3730	26800	7.09723		0.0614	3.01715	0.0233	3.65454	0.002789	2.06216	0.564272		0.000915	2.30466		600	64.7464	23.3	0.851509	17.96	0.370364	18.49	0.426132	2.86641			10070	18.1	22400	113800	232000	25100	92000	17900	1749	1595	6730	1091	1771	184	693	85.3
MA06_2_11	11	47023	59492			27.8	3300	20300	5.95593		0.0662	3.09587	0.0285	3.85958	0.003138	2.30476	0.597154		0.000992	2.47324		770	64.7358	28.5	1.09998	20.2	0.465562	20.04	0.495638	0.798403			9410	12.4	24400	116000	237000	26000	93300	17900	2830	1702	7340	1009	1780	189	703	78.8
MA06_2_12	12	47016	59477			99.9	6660	41300	6.05327		0.0621	2.47761	0.048	3.31344	0.00564	2.20008	0.663986		0.001751	2.47246		686	52.9554	47.6	1.5772	36.25	0.797529	35.37	0.874511	2.48798			9800	17.3	19200	108100	216000	25600	95600	18800	3790	1845	7270	856	1017	78.5	246	25.1
MA06_2_13	13	47008	59466			110	7140	41720	5.64334		0.0612	2.35108	0.0504	3.2765	0.00604	2.28208	0.696498		0.001876	2.52957		643	50.5116	49.9	1.63497	38.82	0.885903	37.87	0.957948	2.50858			9240	21.1	16110	108400	227000	25700	86000	19200	4040	1753	6480	705	790	55.6	154	16.9
MA06_2_14	14	46996	59450			48.3	4167	34400	7.95545		0.0707	2.76129	0.0314	3.56812	0.003248	2.25981	0.633334		0.001016	2.40243		953	56.5198	31.4	1.12039	20.9	0.472301	20.52	0.492978	1.85185			9200	8.9	23500	110100	226000	25000	87300	16810	2760	1570	7030	1032	1800	203	886	102.4
MA06_2_15	15	46985	59440			50.8	5680	35500	6.04961		0.0688	2.53726	0.03042	3.33662	0.003268	2.16688	0.649424		0.001026	2.41906		900	52.3882	30.43	1.01533	21.03	0.455696	20.72	0.501229	1.49614			9870	11.18	24100	121200	237000	24800	92100	17210	3140	1640	7080	1085	1940	220	920	110.8
MA06_2_16	16	46971	59430			60.58	6060	35470	5.63698		0.0605	2.32137	0.03244	3.17631	0.003867	2.16799	0.68255		0.00123	2.43951		632	50.0792	32.41	1.02944	24.88	0.539396	24.84	0.605975	0.161031			8070	8.15	23800	116500	227000	26300	93200	18100	3050	1950	8060	1061	1620	150.5	570	60.3
MA06_2_17	17	46959	59419			60.7	6410	35500	5.33049		0.0595	2.46924	0.03221	3.30186	0.003864	2.19206	0.663886		0.001224	2.33893		606	53.5919	32.18	1.06254	24.86	0.544945	24.72	0.578183	0.566343			8440	8.22	26700	121200	224000	27200	99200	18300	3210	1950	8090	1037	1643	164.9	535	66.6
MA06_2_18	18	46944	59429			60.3	6670	35300	5.15996		0.0597	2.39845	0.03191	3.19447	0.003841	2.11	0.660515		0.001222	2.3042		591	51.9919	31.89	1.01872	24.71	0.521381	24.69	0.568907	0.0810045			9540	9.01	26600	117300	234000	26000	95400	19330	3320	1980	8390	1121	1770	174.6	602	62.7
MA06_2_19	19	46954	59438			69.1	7020	39600	5.50055		0.0591	2.47315	0.0319	3.23118	0.003905	2.07944	0.643553		0.001251	2.36616		578	53.8096	31.9	1.03075	25.12	0.522355	25.27	0.597929	0.593589			8880	9.54	25800	115200	230000	24700	94300	18640	3110	2030	8260	1105	1670	158.8	551	58.6
MA06_2_20	20	46968	59451			62.3	6290	35700	5.53097		0.0581	2.68304	0.0318	3.47324	0.00395	2.2056	0.635028		0.001253	2.34869		510	58.7458	31.7	1.10102	25.41	0.560444	25.3	0.594219	0.434783			8160	9.87	25300	115900	219000	26100	97300	17950	3130	1950	7650	1071	1650	145.2	524	54.3
MA06_2_21	21	46981	59462			62.88	6030	37140	6.17284		0.0571	2.56271	0.0304	3.3952	0.003865	2.22707	0.655949		0.001218	2.47682		476	56.4781	30.4	1.03214	24.87	0.553873	24.59	0.609051	1.13867			8190	58.8	27500	114200	238000	25600	99580	19000	3250	1828	8010	1083	1770	162.9	551	56.6
MA06_2_22	22	46992	59473			110.5	6690	38600	5.8309		0.0585	2.30028	0.0527	3.23922	0.00649	2.28062	0.704066		0.002041	2.48109		549	50.237	52.1	1.68763	41.71	0.951248	41.21	1.02246	1.2133			9630		21400	117800	238000	26900	103900	18700	4780	2010	7870	862	841	46.9	97.4	7.3
MA06_2_23	23	47003	59485			100.2	6150	36510	5.97372		0.0583	2.48112	0.0503	3.41162	0.00617	2.34162	0.686367		0.001983	2.6601		531	54.2553	49.8	1.69899	39.7	0.929624	40	1.06404	0.75			9350		21400	122500	230000	27200	99640	21300	4320	1890	7920	872	985	67	180	14.2
MA06_2_24	24	47013	59497			51.6	5100	32200	6.33714		0.0601	2.5301	0.0302	3.37449	0.003674	2.23289	0.661697		0.001145	2.48665		614	54.7129	30.2	1.0191	23.64	0.527856	23.12	0.574912	2.24913			7820		24600	110400	227000	24600	94000	18200	3080	1849	7570	1038	1622	171	601	61.9
MA06_2_25	25	47004	59505			41	4070	26400	6.5445		0.0682	2.89343	0.0346	3.71471	0.003705	2.32962	0.627133		0.00112	2.65249		850	59.9123	34.5	1.28158	23.84	0.555381	22.63	0.600259	5.34688			8290		25400	109300	221200	25300	88600	17600	2660	1753	7560	1000	1635	169	580	58.5
MA06_2_26	26	46991	59500			80.3	6750	44600	6.72721		0.0585	2.51335	0.0325	3.23006	0.004077	2.02889	0.628127		0.001282	2.29086		558	54.8903	32.5	1.04977	26.23	0.532178	25.89	0.593104	1.31325			9760		28400	119800	230000	25700	96900	18700	3060	2028	8670	1115	1783	175	592	54.7
MA06_2_27	27	46979	59495			65.6	5240	40500	8.05802		0.0603	2.49501	0.0315	3.22661	0.003781	2.04596	0.634089		0.001137	2.32534		609	53.8894	31.4	1.01316	24.33	0.497782	22.97	0.534131	5.92077			9220		27800	118600	213000	25500	90900	19100	2750	1790	7720	1129	1920	199	728	78.4
MA06_2_28	28	46966	59487			54.6	3660	38700	10.7527		0.0648	2.85977	0.0314	3.56464	0.00354	2.12801	0.596976		0.00102	2.35979		740	60.2306	31.4	1.1193	22.78	0.48476	20.61	0.486354	10.5289			9540		25400	113800	223000	24400	89800	19300	2290	1640	7390	1075	2010	223	850	85
MA06_2_29	29	46959	59473			63.7	6120	38900	6.58328		0.0568	2.49659	0.0298	3.22081	0.003838	2.03486	0.631785		0.001164	2.29971		496	55.1309	29.8	0.959801	24.7	0.50261	23.52	0.540891	5.01701			8870		27800	109700	215000	23800	91200	19100	3030	1840	7850	1099	1880	203	739	75.5
MA06_2_30	30	46952	59461			63.5	6310	36900	6.03136		0.0573	2.45608	0.03059	3.18453	0.003938	2.02704	0.636528		0.00122	2.25068		490	54.0567	30.59	0.974147	25.34	0.513652	24.65	0.554793	2.79919			8220		29800	115100	234000	26200	89400	19600	3180	1909	8320	1138	1918	193	693	62.7
MA06_2_31	31	46941	59444			55.3	5730	33410	5.91017		0.0571	2.49344	0.02985	3.23397	0.003774	2.05945	0.636819		0.001177	2.27804		503	54.9514	29.87	0.965988	24.28	0.500035	23.79	0.541946	2.05969			7870	4.5	27800	118400	235000	27400	94300	19500	3290	1910	7980	1096	1970	213	722	63.5
MA06_2_32	32	46968	59468			82.4	7780	47900	6.2383		0.0574	2.30881	0.03103	3.06706	0.003962	2.01898	0.658278		0.001237	2.26534		507	50.782	31.02	0.951402	25.49	0.514637	24.98	0.565882	2.04163			10690	4.88	26500	110200	205000	22600	84700	18690	2880	1810	7970	1085	1830	197	625	62
MA06_2_33	33	46981	59479			92.3	6290	41630	6.65336		0.0563	2.31764	0.0403	3.30731	0.00523	2.35942	0.713395		0.00159	2.69638		456	51.352	40.1	1.32623	33.62	0.793237	32.1	0.865537	4.7352			10120	4.94	24600	116500	223000	24500	94400	18650	3750	1970	7670	934	1420	134	359	30.7
MA06_2_34	34	46991	59488			89.1	6110	42230	6.93963		0.0571	2.49344	0.0398	3.50365	0.00505	2.46136	0.702515		0.001504	2.63164		493	54.9514	39.6	1.38744	32.5	0.799944	30.38	0.799492	6.97828			10140	3.61	24100	116700	218000	26000	95800	19200	3610	1920	7390	971	1566	142	418	36.6
MA06_2_35	35	47017	59457			44.2	2304	32600	14.1443		0.0741	3.00715	0.0335	3.65026	0.003306	2.06916	0.566852		0.000974	2.3097		990	60.6626	33.5	1.22284	21.28	0.440317	19.68	0.454548	8.13008			8980	1.69	28800	115700	233000	25800	92400	18900	2420	1595	7090	1051	2180	289	1036	91.9
MA06_2_36	36	47011	59436			44.9	2375	33600	13.7741		0.0668	2.98808	0.0304	3.64342	0.003297	2.08467	0.572176		0.000963	2.29044		820	62.2948	30.4	1.1076	21.22	0.442368	19.46	0.445719	9.04419			9000	1.43	29600	116300	241000	26000	101900	18400	2400	1624	7230	1061	2200	301	975	103.5
MA06_2_37	37	46999	59439			47.5	4383	34630	7.76398		0.0632	2.59249	0.02847	3.3768	0.003237	2.16374	0.640767		0.000981	2.35139		713	55.072	28.5	0.962389	20.83	0.450708	19.82	0.466046	5.09586			9680	1.52	28700	119200	223000	24800	91900	16970	2810	1548	7120	998	2220	325	1132	108
MA06_2_38	38	47024	59448			44.9	2830	32900	11.4548		0.0667	2.7546	0.0306	3.45306	0.00332	2.08225	0.603017		0.00098	2.35173		798	57.4558	30.6	1.05664	21.36	0.44477	19.81	0.465877	7.82433			9490	1.07	30300	112800	226000	26400	95300	17900	2260	1665	7320	1073	2280	291	984	97.6
MA06_2_39	39	46996	59462			101.2	6760	39640	5.68828		0.0575	2.90816	0.0477	3.69875	0.006	2.28546	0.617902		0.001854	2.58783		530	63.9228	47.3	1.74951	38.59	0.88196	37.4	0.967849	3.18182			9820	2.44	22000	119700	236000	25500	99980	21400	4430	1990	6910	822	1095	90.4	208	15.9
MA06_2_40	40	46983	59429			52.8	6030	35700	5.76369		0.0613	2.45219	0.02908	3.21878	0.003431	2.08502	0.647767		0.001059	2.36755		648	52.6533	29.1	0.936665	22.08	0.460372	21.4	0.506655	3.17757			8820	1.29	30200	117600	239000	25800	94400	19100	3230	1727	7740	1029	2210	275	968	89.6
MA06_2_41	41	46971	59443			72.1	7040	44300	6.0006		0.0578	2.30567	0.03001	3.1405	0.003803	2.13227	0.678961		0.001177	2.31504		521	50.581	30.12	0.945917	24.47	0.521767	23.78	0.550515	2.9016			8950	1.094	29100	114500	216000	24700	95100	18180	3020	1810	7860	1055	2140	256	769	70.3
MA06_2_42	42	46982	59453			70.1	6420	44530	6.63967		0.0578	2.55484	0.02992	3.29697	0.003717	2.08393	0.632077		0.001148	2.30361		539	56.0471	29.93	0.986782	23.92	0.498477	23.19	0.534207	3.14791			9280	1.16	28500	111100	221000	24000	88000	17000	3020	1710	7150	1040	2080	233	724	64.8
MA06_2_43	43	47038	59453			58.6	5260	41450	7.46269		0.0608	2.83015	0.0283	3.48432	0.003385	2.03243	0.583307		0.001035	2.31358		630	60.9467	28.4	0.989548	21.78	0.442663	20.9	0.483538	4.21053			8100	1.036	27100	119000	224000	25600	94200	18000	3120	1725	7290	1058	2270	277	864	80.1
MA06_2_44	44	47025	59470			74.77	4011	45810	10.627		0.0636	2.61846	0.0368	3.34968	0.004274	2.08903	0.623649		0.001193	2.34708		707	55.5024	36.7	1.22933	27.49	0.574273	24.1	0.565647	14.0664			8870	1.163	26800	109500	208700	24500	93300	17600	2610	1650	6800	974	1890	252	778	68.9
MA06_2_45	45	46956	59451			80.5	6800	48460	6.55222		0.0564	2.50084	0.03025	3.20119	0.003897	1.99835	0.624254		0.001209	2.28926		454	55.3736	30.25	0.968359	25.07	0.500987	24.41	0.558807	2.70381			9940	1.225	29500	123200	249000	28400	104600	20400	3320	2030	8650	1157	2180	234	666	58.8
MA06_2_46	46	46969	59419			90.2	6730	55200	7.4239		0.06	2.59615	0.0317	3.30158	0.003857	2.03971	0.617799		0.001193	2.25603		598	56.1752	31.7	1.0466	24.81	0.506052	24.09	0.543479	2.98879			9120	1.33	29500	117400	228000	25400	99200	18400	3010	1970	8130	1156	2100	230	693	56.4
MA06_2_47	47	46991	59417			76.2	6210	46400	6.78426		0.0593	2.40198	0.03113	3.11208	0.003803	1.97876	0.635834		0.001184	2.23909		577	52.1964	31.13	0.968789	24.47	0.484204	23.91	0.535366	2.34212			7870	1.187	27400	113700	231000	26100	95200	19200	3190	1797	7740	1051	1951	224	691	61.1
MA06_1_1	1	43516	55402			76.8	6770	47400	6.20347		0.061	2.55317	0.0314	3.27964	0.003711	2.05848	0.627655		0.001177	2.25931		645	54.9175	31.4	1.02981	23.88	0.491565	23.78	0.537265	0.420521			8060	1.48	27200	117500	229000	25100	93000	17800	3300	1810	7960	1044	2040	223	758	63
MA06_1_2	2	43514	55416			74.6	6600	46500	6.31552		0.0594	2.50406	0.03	3.25003	0.003708	2.0718	0.637473		0.001161	2.28163		568	54.381	30	0.975008	23.86	0.494333	23.45	0.535043	1.7484			7690	1.5	27300	113900	234000	25600	100400	18200	3450	1830	7700	1058	1980	213	712	60.2
MA06_1_3	3	43512	55430			74.7	6650	46600	6.31712		0.0586	2.67674	0.03	3.39679	0.003708	2.09124	0.615651		0.00115	2.24577		539	58.4217	30	1.01904	23.86	0.49897	23.24	0.521917	2.66781			7820	1.67	29600	126700	241000	27000	103800	19100	3370	1922	8220	1096	2220	226	764	65.9
MA06_1_4	4	43509	55444			80.6	6320	48200	6.97788		0.061	2.58508	0.0324	3.27363	0.003846	2.00849	0.613537		0.001198	2.27346		659	55.6038	32.4	1.06066	24.74	0.496901	24.2	0.550177	2.2314			8590	1.92	28100	118200	243000	26400	97700	18800	3090	1870	7600	1080	2090	230	704	65.1
MA06_1_5	5	43507	55461			80	6880	47600	6.44745		0.0573	2.5943	0.03008	3.32807	0.003847	2.08463	0.626377		0.001203	2.29061		505	57.0989	30.08	1.00108	24.75	0.515946	24.31	0.556847	1.80995			8610	2.16	29000	113600	214000	25500	98300	18100	3040	1870	8150	1093	2147	220	743	65
MA06_1_6	6	43508	55478			93.9	7800	54400	6.57462		0.0579	2.51968	0.03112	3.24278	0.003916	2.04128	0.629484		0.001227	2.30304		511	55.2402	31.11	1.00883	25.19	0.514198	24.79	0.570924	1.61355			9200	2.8	30000	109300	213200	23700	88800	17870	3080	1960	8540	1212	2140	217	695	64
MA06_1_7	7	43509	55495			79.9	6770	47500	6.72495		0.0602	2.52906	0.03128	3.2313	0.003809	2.01126	0.62243		0.00119	2.21909		606	54.6576	31.27	1.01043	24.51	0.492959	24.03	0.533248	1.9975			8370	2.82	28000	111500	219000	25400	94700	18100	3080	1900	7830	1143	2110	206	630	62.3
MA06_1_8	8	43511	55512			68.4	6240	40300	6.26723		0.0585	2.58047	0.0313	3.34493	0.003842	2.12833	0.636284		0.001198	2.34574		552	56.3561	31.3	1.04696	24.72	0.526122	24.2	0.567669	2.14876			8220	3.1	26900	116400	217000	25000	95800	18200	3040	1830	7700	1076	2060	207	689	65.5
MA06_1_9	9	43523	55518			61.7	5800	35900	6.09459		0.0635	2.49642	0.03355	3.21282	0.003833	2.0224	0.629478		0.001207	2.25323		734	52.9443	33.5	1.0763	24.66	0.498724	24.38	0.549338	1.14848			7520	3.45	27800	111300	217000	24300	91200	18440	3140	1720	7290	1040	1910	209	703	66.8
MA06_1_10	10	43534	55504			43.5	4460	31700	7.06714		0.0772	2.62049	0.0341	3.37259	0.003215	2.12307	0.629507		0.000964	2.35712		1136	52.2184	34	1.14668	20.69	0.439263	19.48	0.459167	6.2115			9670	5.17	25600	109600	212000	24200	84400	15900	2840	1388	6200	989	2200	254	1042	98.2
MA06_1_11	11	43538	55488			11.06	3240	8380	2.56871		0.11	3.40641	0.0374	4.16251	0.002471	2.39225	0.574713		0.000947	2.59721		1770	61.9781	37.3	1.55262	15.91	0.380607	19.13	0.496847	16.8322			17300	20.2	21900	100300	206000	23300	83900	15200	1950	1430	5580	832	1750	166	637	63.8
MA06_1_12	12	43542	55466			19.5	2290	13700	5.89623		0.087	2.93978	0.0371	3.63738	0.003062	2.14202	0.58889		0.001014	2.42359		1340	56.649	37	1.34583	19.71	0.422192	20.48	0.49635	3.75977			9840	9.12	23500	112100	213000	23100	82700	15700	2910	1379	5960	881	1980	230	914	89.9
MA06_1_13	13	43546	55441			45.7	6660	28100	4.19463		0.0606	2.49205	0.0308	3.18717	0.003687	1.9869	0.623405		0.001144	2.26635		621	53.7293	30.79	0.98133	23.72	0.471293	23.11	0.523755	2.63955			7910	8.25	28000	118000	235000	26400	98700	19400	3440	1830	8220	1149	2060	218	767	70.4
MA06_1_14	14	43543	55420			35.6	5520	21590	3.85951		0.0598	2.5984	0.0299	3.37775	0.003621	2.15812	0.638922		0.001182	2.3858		577	56.2921	29.9	1.00995	23.3	0.502841	23.87	0.569491	2.38793			8250	7.39	24100	107900	216000	25000	90100	17300	3190	1750	7540	1010	1880	193	694	61.7
MA06_1_15	15	43538	55404			45.4	7370	28660	3.80084		0.0614	2.41782	0.03008	3.17722	0.003606	2.06127	0.648767		0.001134	2.28792		653	51.8852	30.09	0.956025	23.2	0.478215	22.9	0.523933	1.31004			8560	8.28	28100	118000	237000	26300	94000	20500	3480	1900	7650	1109	2150	226	745	71.3
MA06_1_16	16	43526	55414			47.5	6600	27790	4.11523		0.0596	2.46827	0.03158	3.22787	0.003828	2.08009	0.644417		0.001207	2.28971		591	53.5381	31.56	1.01872	24.63	0.512327	24.39	0.558459	0.98401			8380	6.95	26100	125500	230000	26600	95100	18700	3260	1820	7630	1068	1920	195	677	65
MA06_1_17	17	43526	55429			41.2	6880	27070	3.78788		0.0595	2.50304	0.02834	3.30466	0.003455	2.15767	0.652919		0.001089	2.39681		582	54.3255	28.37	0.937532	22.24	0.479867	22	0.527299	1.09091			8810	6.31	26300	110900	233000	25800	102800	18900	2960	1770	7890	1078	2150	207	762	77.7
MA06_1_18	18	43525	55444			35	11350	29940	2.55428		0.0516	2.35915	0.01947	3.08255	0.002771	1.98407	0.643647		0.000834	2.33213		268	54.1163	19.58	0.603564	17.84	0.353959	16.86	0.393198	5.81257			11040	3.55	24100	115600	221000	24800	92600	16600	1346	1609	6780	996	1980	217	857	85.7
MA06_1_19	19	43524	55459			39.76	7130	28000	3.75235		0.0564	2.63883	0.02601	3.38626	0.003347	2.12212	0.626684		0.001026	2.33709		459	58.429	26.07	0.882799	21.54	0.457104	20.72	0.484245	3.95753			8270	4.39	25700	112200	227000	25300	93700	18900	2620	1760	7450	1022	1920	207	766	72.2
MA06_1_20	20	43523	55474			44.3	7410	26650	3.5014		0.0575	2.41841	0.03011	3.20606	0.003766	2.10478	0.656501		0.001175	2.31553		508	53.1578	30.12	0.965664	24.23	0.509988	23.74	0.549708	2.06403			7590	4.73	27200	111400	237000	24800	99800	18600	3330	1790	7870	1087	2020	196	677	62.8
MA06_1_21	21	43523	55489			38.71	6540	24140	3.67918		0.0702	2.49629	0.03462	3.21856	0.003555	2.03167	0.631236		0.001142	2.28603		921	51.2106	34.56	1.11234	22.87	0.464644	23.06	0.527158	0.823938			8640	4.51	24500	113900	215000	24700	95300	17530	3120	1720	7520	1075	1932	203	680	66.3
MA06_1_22	22	43522	55504			44.8	7120	27230	3.89712		0.0608	2.55528	0.0317	3.27407	0.003769	2.04697	0.625206		0.001188	2.31232		628	55.0276	31.6	1.03461	24.25	0.49639	24	0.554956	1.04167			7740	3.64	25100	108900	211000	24300	89200	17200	3110	1792	7630	982	1867	194	668	60.5
MA06_1_23	23	43550	55410			33.16	5250	21560	4.23549		0.0612	2.70647	0.0289	3.3788	0.003413	2.02269	0.598643		0.001101	2.31569		620	58.1468	28.9	0.976472	21.96	0.444184	22.24	0.515008	1.25899			7960	3.05	23100	107300	220000	24500	84500	17700	2380	1573	6700	943	1920	197	737	79.7
MA06_1_24	24	43561	55423			21.7	5790	18000	3.26691		0.0707	2.78678	0.0233	3.48819	0.002382	2.09794	0.601439		0.000866	2.32071		965	57.0416	23.4	0.816238	15.33	0.321614	17.49	0.405892	12.3499			10130	3.84	21120	116600	226000	24600	91200	17200	3220	1491	6240	900	1720	169	645	64.1
MA06_1_25	25	43572	55437			26.5	6350	23300	3.92619		0.0712	2.83113	0.0254	3.66912	0.002581	2.33391	0.636096		0.000834	2.38299		946	57.8207	25.5	0.935625	16.62	0.387896	16.86	0.401773	1.42349			10790	2.51	22100	112500	232000	25700	100100	18800	2000	1570	6480	953	1800	190	725	72.2
MA06_1_26	26	43558	55439			47.1	6610	30800	5.03271		0.106	7.16612	0.053	7.47177	0.003598	2.11523	0.283097		0.001103	2.33465		1090	131.484	50	3.73589	23.15	0.489677	22.29	0.520393	3.85823			9260	3.54	25400	115000	234000	26200	98600	18400	2950	1772	7820	1020	1908	212	757	75.2
MA06_28_1	1	40126	74414			48	6690	31400	5.14668		0.072	2.48126	0.035	3.2099	0.003501	2.03637	0.634402		0.001094	2.3372		996	50.4986	35	1.12346	22.53	0.458793	22.1	0.516522	1.9457			8340	3.94	25000	114700	232000	24700	99790	18000	3360	1770	7310	1093	1990	219	733	72.3
MA06_28_2	2	40139	74413			59.1	7310	37900	5.67537		0.0647	2.63618	0.0319	3.30583	0.003581	1.99476	0.603408		0.001117	2.29202		743	55.5506	31.8	1.05125	23.05	0.459793	22.57	0.517309	2.12672			9500	4.46	32900	113900	216000	23800	90700	17800	2990	1720	8010	1270	2710	358	1660	230
MA06_28_3	3	40151	74422			46.6	4600	28800	6.84932		0.1008	2.88089	0.0542	3.55307	0.003903	2.07961	0.5853		0.001169	2.26099		1640	53.4855	53.6	1.90445	25.11	0.522191	23.61	0.533819	6.35324			10360	4.25	25800	112800	221400	25400	92800	17700	2730	1722	7210	1062	1960	193	652	72
MA06_28_4	4	40161	74437			3.1	281	1300	5.05051		0.344	3.66257	0.292	5.41216	0.00616	3.9846	0.736231		0.00183	3.93388		3670	55.8982	259	14.0175	39.6	1.5779	36.9	1.4516	7.31707			50600	18.2	14300	77000	190000	21000	61000	12700	2150	1110	4430	620	1190	102	536	61
MA06_28_5	5	40124	74431			2.91	10410	1619	0.170126		0.0471	2.5347	0.02453	3.25201	0.003807	2.03736	0.626493		0.001287	2.51615		65	60.4735	24.6	0.799994	24.5	0.499153	26	0.654199	5.76923			1110	5.51	349000	56.6	552	217	2660	3700	1297	4320	38900	10810	34000	6230	33400	4870
MA06_28_6	6	40123	74482			55.1	6570	35300	5.81395		0.0829	2.57246	0.0408	3.2895	0.003579	2.05017	0.623249		0.001106	2.33381		1287	50.2278	40.8	1.34211	23.03	0.472155	22.35	0.521606	3.04251			8220	3.85	25700	121800	235000	26000	98000	18600	3290	1720	7620	1069	1900	191	622	63.4
MA06_28_7	7	40138	74485			4.65	1153	2747	2.58799		0.163	3.25607	0.0656	4.00388	0.002875	2.33005	0.581947		0.001233	2.40505		2480	54.8802	64.5	2.58251	18.5	0.431059	24.91	0.599098	25.7326			14900	2.26	12060	78300	186000	20000	66400	12400	1620	1014	4170	514	932	103	361	36.1
MA06_28_8	8	40123	74492			17.3	2340	11700	5.26316		0.1087	3.31175	0.0452	4.01499	0.003094	2.2699	0.565356		0.001099	2.48673		1800	60.4169	44.9	1.80273	19.91	0.451937	22.19	0.551804	10.2749			10870	2.03	16100	86800	191000	20000	76500	13200	1172	1150	4680	700	1280	139	476	62.9
MA06_28_9	9	40125	74442			5.66	13830	2650	0.19984		0.0478	2.30912	0.02898	3.19635	0.004462	2.21012	0.69145		0.001515	2.4589		93	54.7306	29	0.926942	28.7	0.634304	30.6	0.752424	6.20915			890	4.99	350000	46.1	389	168	2000	2920	1169	3700	36200	10800	32500	5470	27500	4030
MA06_28_10	10	40136	74439			5.3	11860	2647	0.235239		0.0486	2.89552	0.0282	3.69072	0.00426	2.28854	0.620079		0.001438	2.78482		130	68.1307	28.3	1.04448	27.37	0.626374	29	0.807597	5.62069			10500	6.47	315000	2740	6400	800	4540	3660	1248	4000	36300	10380	32300	5230	27300	4070
MA06_28_11	11	40148	74440			5.96	12870	3348	0.262743		0.04732	2.2205	0.02367	3.13543	0.003681	2.21367	0.706016		0.001262	2.46175		62	52.8668	23.75	0.744665	23.69	0.524418	25.48	0.627254	7.02512			1220	7.04	354000	250	970	286	2880	3940	1380	4380	40100	11000	33100	5700	29900	4440
MA06_28_12	12	40147	74452			21.4	12440	12620	0.980392		0.0493	2.38203	0.02516	3.18203	0.003715	2.1098	0.663035		0.001195	2.32865		165	55.7023	25.23	0.802826	23.9	0.504241	24.15	0.562368	1.0352			3440	7.43	261000	29400	51800	6140	24400	7320	1720	3710	30800	8200	24500	4520	23200	3520
MA06_28_13	13	40136	74456			5.85	10860	2856	0.262536		0.0464	2.36869	0.02474	3.18687	0.003866	2.13201	0.668997		0.001448	2.49198		31	56.8963	24.81	0.790663	24.87	0.53023	29.25	0.728903	14.9744			1310	8.22	315000	1090	2780	418	3490	4000	1402	4380	40100	10550	32100	5550	31000	4660
MA06_28_14	14	40126	74455			4.68	10580	2644	0.250815		0.0467	2.49757	0.02464	3.24557	0.003841	2.07265	0.638609		0.001263	2.52494		45	59.8169	24.71	0.801981	24.72	0.512359	25.5	0.643858	3.05882			1070	9.4	355000	57.1	502	228	2750	3900	1447	4440	42800	11300	34100	5660	31900	4870
MA06_28_15	15	40134	74465			57.4	5240	34970	6.70691		0.0591	2.76393	0.0304	3.53651	0.003742	2.20625	0.623851		0.001141	2.32428		554	60.1362	30.4	1.0751	24.08	0.531266	23.04	0.535514	4.51389			7930	7.49	46900	108400	212000	24300	89600	17560	2990	1960	9370	1670	3840	586	2580	418
Avg																																				105792	207913	23399.8	87304.6	17248.9	2924.13	2002.03	10233	1858.31	4432.08	647.521	3090.84	427.292
Chond																																				0.367	0.957	0.137	0.711	0.231	0.087	0.058	0.381	0.085	0.249	0.036	0.248	0.038
Norm																																				288260	217255	170802	122791	74670.4	33610.7	34517.8	26858.1	21862.5	17799.5	17986.7	12463.1	11244.5
MA11_1_1	1	20106	87260			19.3	2520	20700	8.16993		0.0777	3.67913	0.0296	4.39266	0.002788	2.39988	0.54634		0.00067	2.49776		1150	73.1753	30.4	1.33537	17.95	0.430779	13.54	0.338197	32.5702			13560	8.04	27500	121300	245000	28800	107700	22900	3850	2030	8430	1166	2180	242	962	107.8
MA11_1_2	2	20103	87249			48.5	11330	39200	3.47826		0.0656	2.41484	0.02402	3.20924	0.002662	2.11371	0.658632		0.000871	2.3921		791	50.6495	24.1	0.773427	17.14	0.36229	17.6	0.42101	2.61364			11880	10.31	28400	116000	232000	25500	99610	21300	4040	2340	10160	1233	1850	158	444	45.3
MA11_1_3	3	20095	87240			47.2	10990	38110	3.51617		0.0644	2.69764	0.0239	3.4087	0.002686	2.08374	0.6113		0.00087	2.31933		743	56.9359	24	0.818088	17.29	0.360279	17.59	0.407971	1.70551			11350	9.52	28100	108200	214000	25200	92400	20200	3910	2160	9070	1253	1970	158	442	45.2
MA11_1_4	4	20121	87236			51.2	11060	41400	3.74251		0.0651	2.41896	0.02488	3.14675	0.002757	2.01263	0.63959		0.000881	2.31562		783	50.8669	24.95	0.785115	17.75	0.357242	17.8	0.41218	0.280899			12420	16.1	12400	116900	239000	27400	108000	19600	3190	1352	4630	502	717	54.4	147	15.8
MA11_1_5	5	20133	87244			22.46	4570	20040	4.37637		0.1489	3.03598	0.048	3.91124	0.002382	2.46589	0.630462		0.00077	2.43886		2320	51.9827	47.5	1.85784	15.34	0.378267	15.56	0.379487	1.41388			10620	11.7	20700	110600	211000	25700	94800	18200	3860	1519	6350	918	1610	162.8	688	86.9
MA11_1_6	6	20114	87146			7.33	998	2680	2.6976		0.462	3.22224	0.273	4.14716	0.00433	2.61077	0.629531		0.001944	2.53332		4110	47.8176	245	10.1605	27.8	0.725793	39.26	0.99458	29.19			13100	9	13100	72000	170000	18300	66900	13200	2540	1139	4400	599	1040	115	383	47.7
MA11_1_7	7	20108	87129			25.5	3620	19000	5.30786		0.254	2.57407	0.1113	3.41882	0.00313	2.25001	0.658123		0.000956	2.48931		3227	40.67	107	3.65814	20.15	0.453376	19.32	0.480934	4.29607			10300	12.7	22400	104000	206000	24900	90900	18200	3160	1630	6970	1019	1802	208	782	96.7
MA11_1_8	8	20108	87116			7.77	930	2810	3.05064		0.459	2.83426	0.326	3.85387	0.00509	2.61137	0.677598		0.001961	2.82446		4103	42.0839	286	11.0221	32.7	0.853919	39.6	1.11849	17.4242			17400	12.6	14200	76600	171000	18200	65600	13300	2950	1140	4470	623	1070	105	397	48.7
MA11_1_9	9	20056	87103			46.76	6090	36910	6.10128		0.1599	2.67955	0.0672	3.46891	0.003056	2.20303	0.63508		0.000892	2.40702		2437	45.3105	66	2.28948	19.67	0.433336	18.01	0.433503	9.2171			12100	21.8	23800	113700	232000	28500	100300	20000	3260	1710	6870	990	1790	203	810	99
MA11_1_10	10	20057	87120			46.38	10240	37970	3.71195		0.0646	2.5477	0.02412	3.33451	0.002704	2.15132	0.645168		0.000861	2.37192		747	53.7145	24.2	0.806951	17.41	0.374544	17.4	0.412715	0.0574713			11670	31.2	19100	112300	223000	26800	96400	18300	3380	1530	6260	844	1290	122	361	39.4
MA11_1_11	11	20058	87137			37.6	10830	32950	3.00933		0.0624	2.57009	0.02145	3.29575	0.002488	2.06314	0.626002		0.000813	2.36622		685	54.8392	21.55	0.710233	16.02	0.330516	16.42	0.388534	2.43605			10830	47.5	21500	120500	230000	27300	98000	18660	3440	1586	6690	919	1515	148.3	460	52.4
MA11_1_12	12	20143	86998			38.1	5680	30210	5.19751		0.188	2.32827	0.083	3.16841	0.003125	2.14895	0.678242		0.000896	2.31069		2719	38.3533	80.9	2.56325	20.11	0.432154	18.1	0.418235	11.105			10370	42.4	25800	105100	230000	25800	96600	19800	3440	1705	7450	1108	1870	225	853	112.1
MA11_1_13	13	20174	86986			20.3	4260	17800	4.05022		0.248	3.04769	0.1001	4.03237	0.00294	2.64038	0.654797		0.000841	2.75085		3199	48.2989	96.8	3.90334	18.89	0.498769	16.99	0.46737	11.183			11800	49.6	22800	105900	228000	24800	101300	18800	3410	1630	7020	1002	1740	198	736	96.8
MA11_1_14	14	20127	87016			48.1	15570	38200	2.38834		0.1058	3.15448	0.0416	3.78927	0.002833	2.09948	0.554059		0.000914	2.35196		1680	57.9037	41.3	1.56497	18.24	0.382946	18.46	0.434172	1.19177			12030	63.4	22900	107800	222000	26100	97100	18000	3530	1676	7180	924	1450	135.8	394	47.6
MA11_1_15	15	20117	87034			63.1	19610	40700	2.00965		0.2005	2.63264	0.0928	3.41725	0.003339	2.17873	0.637566		0.001119	2.40568		2836	42.9513	90	3.07553	21.49	0.468208	22.61	0.543925	4.95356			15490	93.3	8380	119500	242000	28000	105600	19400	3210	1138	3490	344	423	29.6	80.6	9.1
MA11_1_16	16	20106	87060			39.11	16630	32130	1.87758		0.0697	2.47173	0.02564	3.26838	0.002674	2.13843	0.654277		0.000875	2.26779		916	50.8224	25.7	0.839974	17.22	0.368237	17.68	0.400945	2.60181			11770	67.6	16100	119900	238000	27700	107500	21000	3540	1670	5840	684	890	75	183	21.3
MA11_1_17	17	20103	87089			40.9	9380	32380	3.38983		0.1472	2.6284	0.0595	3.46044	0.002895	2.25081	0.650442		0.000892	2.49843		2305	45.0973	58.7	2.03128	18.64	0.419552	18.03	0.450467	3.38325			10560	56.1	25400	112100	222000	26000	101100	19300	3720	1868	8080	1173	1780	184	619	78.8
MA11_1_18	18	20091	87114			45.5	9600	35830	3.62319		0.183	3.04153	0.0785	3.75725	0.003087	2.20591	0.587106		0.000921	2.39525		2670	50.3117	76.5	2.8743	19.87	0.438314	18.6	0.445517	6.82796			11250	48.5	27300	116100	230000	25500	96200	17600	3290	1681	7780	1174	1950	236	856	108.1
MA11_1_19	19	20089	87144			51.4	11260	40420	3.5137		0.1572	2.54642	0.0682	3.27028	0.003105	2.05194	0.627451		0.000935	2.36734		2422	43.1857	67	2.19109	19.98	0.409977	18.89	0.44719	5.77025			11780	54.6	15500	126700	233000	28500	103900	18400	3140	1391	5210	727	1139	122	451	54.4
MA11_1_20	20	20098	87176			46.1	16380	37700	2.2779		0.0655	2.85053	0.0243	3.616	0.00267	2.22484	0.615278		0.000872	2.53145		770	59.8183	24.4	0.882303	17.19	0.38245	17.63	0.446295	2.49575			11520	59.7	11900	121600	235000	25900	106400	18600	3200	1286	4500	517	729	54.3	157	18.4
MA11_1_21	21	20104	87196			47.8	17550	39790	2.34192		0.062	2.37894	0.02329	3.17415	0.002687	2.1014	0.662035		0.000875	2.36643		682	50.8754	23.37	0.741799	17.3	0.363542	17.68	0.418385	2.14932			12060	48.5	7040	114400	234000	27200	103400	18300	2950	1061	3070	298	372	24	63.7	7.4
MA11_1_22	22	20128	87209			54.4	15810	40700	2.66099		0.1378	2.88441	0.0574	3.6294	0.003006	2.20289	0.606958		0.00097	2.41985		2181	50.099	56.6	2.05424	19.35	0.42626	19.6	0.47429	1.27551			12160	44.2	9600	131300	241000	28500	106400	19800	3300	1287	3890	411	565	41.4	114	12
MA11_1_23	23	20094	87208			59.7	19400	43700	2.38039		0.1296	2.77764	0.0528	3.54111	0.002947	2.1964	0.620257		0.000973	2.37579		2094	48.8221	52.2	1.84846	18.97	0.416657	19.65	0.466844	3.46056			13750	48.9	9830	115500	254000	28600	101000	19900	3470	1244	4180	390	514	37.4	99.2	11.1
MA11_1_24	24	20079	87163			68.5	12660	36820	3.03951		0.3509	2.11989	0.2058	3.07285	0.004275	2.22452	0.723927		0.001344	2.38983		3710	32.2875	190	5.83841	27.5	0.611742	27.16	0.649079	1.25184			11660	30.6	23900	115600	223000	24000	89600	17600	3230	1612	7570	1000	1620	153.1	452	56.6
MA11_1_25	25	20077	87126			53.7	9630	44300	4.81232		0.0994	2.97889	0.0392	3.65484	0.002823	2.11756	0.579384		0.000883	2.31495		1590	55.491	39	1.42539	18.17	0.38476	17.83	0.412756	1.9069			10620	32.2	16580	120600	233000	27100	98900	17800	3110	1312	5300	696	1226	140.3	497	63.1
MA11_1_26	26	20083	87098			59.5	11740	43300	3.90016		0.1516	2.41093	0.0638	3.18909	0.003066	2.08751	0.65458		0.000976	2.37473		2356	41.1482	62.7	1.99956	19.73	0.411866	19.71	0.468059	0.101471			11680	38.8	9440	119900	237000	26400	99550	18800	3300	1136	3680	394	499	40.6	124	13.6
MA11_1_27	27	20094	87040			62.03	16180	44330	2.84414		0.1535	2.17678	0.0648	3.03181	0.00307	2.11034	0.696064		0.001007	2.34298		2382	37.0704	63.7	1.93126	19.76	0.417002	20.35	0.476797	2.89926			13460	42.3	14900	121900	247000	28000	106000	20000	3500	1480	5220	618	830	65	186	19.4
MA11_1_28	28	20108	87016			57.1	13820	46400	3.49284		0.0631	2.33639	0.02373	3.11946	0.002749	2.06696	0.662602		0.000887	2.33787		704	49.6588	23.81	0.742743	17.7	0.365852	17.91	0.418712	1.17253			13380	44.4	6590	118100	244000	26800	100200	17790	2860	936	2810	279	350	24.2	58.6	7.69
MA11_1_29	29	20141	87029			3.54	357	826	2.39808		0.62	3.36222	0.586	5.35605	0.0069	4.16926	0.778421		0.00314	4.35524		4550	48.7327	467	25.0128	44.2	1.84281	63.3	2.75687	30.1738			32300	13	8500	58200	146000	14500	52800	8900	2000	840	3070	381	590	58	251	27
MA11_1_30	30	20133	87054	Off target?																										#DIV/0!
MA11_1_31	31	20123	87170			29.37	5430	19620	3.63901		0.251	2.68776	0.1085	3.496	0.003131	2.23561	0.639477		0.001058	2.52249		3174	42.5299	104.4	3.64982	20.15	0.450475	21.37	0.539056	5.70894			9600	22.2	20500	102700	216000	23400	91400	18110	3530	1574	6640	952	1521	157	579	69.7
MA11_7_1	1	15520	88216			29.08	4465	21840	4.96032		0.182	3.13583	0.0767	3.83633	0.003009	2.20998	0.576067		0.000942	2.53803		2630	51.9158	74.9	2.87341	19.37	0.428073	19.02	0.482734	1.84017			9960	24.2	22900	111400	230000	25000	101100	19200	3440	1750	7170	973	1683	181	627	83.4
MA11_7_2	2	15509	88217			44.7	10340	37000	3.58809		0.0695	2.69607	0.0264	3.41229	0.002761	2.09164	0.612973		0.000869	2.34435		917	55.4862	26.5	0.904258	17.77	0.371685	17.57	0.411902	1.1383			11880	30.7	12740	118400	228000	26900	106500	20300	3520	1440	4920	564	727	67.4	207	27.1
MA11_7_3	3	15494	88218			43	10610	34470	3.29707		0.0577	2.38041	0.02231	3.1811	0.002815	2.11023	0.663364		0.000885	2.4564		507	52.2544	22.41	0.712885	18.12	0.382373	17.88	0.439204	1.34228			11150	33.8	12950	122000	235000	26800	102600	20200	3600	1467	4940	580	741	60.1	179	22.7
MA11_7_4	4	15479	88218			42.2	9290	32600	3.52609		0.0804	2.5687	0.0319	3.30271	0.002888	2.07597	0.628567		0.000912	2.37587		1191	50.5882	31.8	1.05026	18.59	0.385924	18.43	0.437872	0.86815			11600	29.1	16640	119600	242000	28600	107000	21200	3840	1660	6110	771	1151	107.1	335	42.5
MA11_7_5	5	15471	88227			36.7	7000	29800	4.29553		0.0602	2.59391	0.02359	3.39467	0.002834	2.18985	0.645084		0.000868	2.36916		602	56.0591	23.67	0.803519	18.24	0.399428	17.53	0.415313	4.0502			9930	25.2	17900	116000	240000	26000	103100	18900	3380	1520	5980	762	1310	132	473	59.3
MA11_7_6	6	15483	88228			44.9	10050	36100	3.59066		0.0617	2.38141	0.024	3.20926	0.002819	2.15133	0.670351		0.000888	2.36148		655	51.0156	24.08	0.772789	18.15	0.390466	17.94	0.423649	1.17057			13030	37.7	9110	126000	244000	27800	107800	18600	3510	1306	3870	413	521	41.3	120	11.8
MA11_7_7	7	15496	88230			42.9	10320	33300	3.17864		0.0586	2.33633	0.02317	3.15166	0.00284	2.1153	0.671172		0.00091	2.35339		560	50.992	23.26	0.733075	18.28	0.386677	18.38	0.432554	0.54407			11850	33.8	10260	119500	235000	28100	105600	19700	3300	1286	4170	452	604	50.9	146	18.9
MA11_7_8	8	15514	88227			4.98	502	1297	2.52972		0.519	2.76977	0.468	3.80934	0.00633	2.61523	0.686533		0.00277	2.94841		4287	40.7022	389	14.8183	40.7	1.0644	55.9	1.64816	27.1914			14200	14.5	10690	64700	160000	17100	56700	11400	2100	831	3770	470	839	96.7	316	46.7
MA11_7_9	9	15493	88242			30.89	4560	24660	5.30504		0.159	3.08696	0.0668	3.75459	0.00304	2.1372	0.569224		0.000884	2.36299		2400	52.2502	65.6	2.46301	19.57	0.41825	17.86	0.42203	9.57447			9680	20.8	24500	108400	218000	23500	99000	18400	2900	1690	7230	1047	1890	221	890	110.3
MA11_7_10	10	15483	88240			45.4	10430	35990	3.33333		0.0705	2.60501	0.0275	3.36033	0.002847	2.12267	0.631685		0.000894	2.40618		924	53.3688	27.5	0.924091	18.33	0.389086	18.06	0.434556	1.49502			13850	39.7	12860	121800	245000	27600	104700	21100	3730	1505	4610	530	773	71.3	225	27.4
MA11_7_11	11	15464	88241			35.77	3530	31240	8.62069		0.0675	2.69072	0.0264	3.47907	0.002837	2.20543	0.633914		0.000822	2.36252		859	55.9031	26.5	0.921953	18.27	0.402932	16.62	0.392651	9.9278			9190	24.3	25200	113700	230000	26700	104300	20100	3290	1820	7670	1152	1940	229	894	109.8
MA11_7_12	12	15461	88254			35.7	5400	31110	5.55864		0.0577	2.72019	0.02147	3.5083	0.002675	2.21556	0.631519		0.000831	2.35889		519	59.7133	21.56	0.756388	17.22	0.381519	16.78	0.395822	2.62217			9670	24.8	25700	113400	237000	27100	98600	19500	3230	1877	7830	1179	2100	235	968	125.4
MA11_7_13	13	15462	88266			36.4	5170	31800	5.94884		0.0582	2.77621	0.022	3.56185	0.002728	2.23147	0.62649		0.000825	2.43709		507	60.747	22.1	0.78717	17.56	0.391846	16.66	0.406019	5.40216			9560	24.4	26600	114700	236000	26000	111100	19900	3190	1840	7880	1148	2020	239	912	121.3
MA11_7_14	14	15468	88274			27.81	4400	23020	4.92854		0.161	3.17369	0.0644	3.92628	0.002894	2.31157	0.588743		0.000889	2.58837		2520	53.6037	63.2	2.48141	18.63	0.430645	17.96	0.464871	3.73051			9430	27.3	23100	108800	223000	26600	94400	19300	3050	1720	7420	1039	1900	214.1	812	114.8
MA11_7_15	15	15479	88273			16.14	3425	11660	3.33667		0.2278	2.67338	0.0932	3.52607	0.002963	2.29918	0.652052		0.001013	2.71226		3044	42.841	90.4	3.18757	19.07	0.438453	20.46	0.554929	6.79374			9090	28	20100	106800	208000	23000	85900	17900	3270	1596	6660	922	1558	178	651	83.4
MA11_7_16	16	15486	88264	Off target?																										#DIV/0!
MA11_7_17	17	15492	88254			4.17	288	720	2.5		0.538	2.6377	0.65	3.9051	0.0087	2.87964	0.737405		0.00401	2.91355		4343	38.6494	506	19.7598	55.9	1.60972	80.9	2.35706	30.9023			13300	17.8	10500	53900	138000	14600	53800	10010	1630	740	3240	474	797	99	308	48
MA11_7_18	18	15481	88251			38.5	5300	32800	6.20309		0.0695	2.69607	0.0265	3.44203	0.002783	2.13982	0.621673		0.000847	2.35262		923	55.4862	26.5	0.912139	17.92	0.383456	17.1	0.402298	4.79532			9290	34.5	22300	115000	225000	27300	101500	19500	3110	1690	6940	1057	1790	208	776	102.1
MA11_7_19	19	15472	88249			38.12	5760	33050	5.68505		0.0577	2.72019	0.02151	3.44904	0.002739	2.12048	0.614802		0.000839	2.40579		495	59.7133	21.61	0.745337	17.63	0.37384	16.95	0.407782	4.0118			10040	35.1	28600	106500	238000	27300	107600	21700	3480	1860	7980	1219	2050	247	965	127.2
MA11_7_20	20	15473	88262			37.4	5760	31790	5.52792		0.0604	2.71644	0.0226	3.45569	0.00275	2.13605	0.618126		0.000848	2.30156		603	58.6371	22.7	0.784442	17.7	0.378082	17.13	0.394257	3.3275			9120	33.9	24900	102700	207000	24800	93300	18000	3080	1599	7310	1099	1990	215	897	114
MA11_5_1	1	15104	88131			35.4	6660	28610	4.40723		0.064	2.55367	0.02542	3.33825	0.002828	2.15004	0.644062		0.000877	2.29222		746	54.0125	25.49	0.85092	18.2	0.391307	17.71	0.405952	2.7668			9050	40.7	21900	104000	214000	25100	96300	18500	3350	1570	6620	959	1635	172	660	88.5
MA11_5_2	2	15116	88131			36.5	9760	28630	2.99401		0.0617	2.51384	0.02421	3.28013	0.002839	2.10709	0.642381		0.000909	2.33027		661	53.8526	24.29	0.796744	18.28	0.385177	18.36	0.427837	0.43573			10940	56.1	10010	122500	251000	27800	107000	20700	3880	1413	4280	430	535	38.7	100	10.5
MA11_5_3	3	15128	88133			31.4	10580	24560	2.35294		0.057	2.38666	0.022	3.14718	0.002806	2.05149	0.65185		0.000904	2.35556		480	52.6331	22.09	0.695212	18.06	0.370499	18.26	0.430126	1.09529			10050	46	16300	117700	237000	26400	107500	20800	3850	1684	6040	725	1019	83.7	237	25.7
MA11_5_4	4	15138	88139			29.77	7450	24580	3.23625		0.0599	2.499	0.02215	3.29922	0.002686	2.15402	0.652889		0.000844	2.35378		584	54.1058	22.24	0.733746	17.29	0.372431	17.04	0.401084	1.46714			9810	36.4	26900	107200	221000	25500	98000	19200	3540	1860	8120	1143	1950	206	709	86.9
MA11_5_5	5	15145	88148			25.25	6320	20300	3.1348		0.1213	3.37662	0.0479	3.98646	0.002812	2.11903	0.531557		0.000866	2.36994		1910	60.1536	47.5	1.89357	18.1	0.383544	17.51	0.414977	3.3695			10430	36.3	28700	113000	235000	27900	101700	20900	3720	2080	8310	1232	2160	209	743	103.1
MA11_5_6	6	15144	88157			19.59	3601	14590	3.97614		0.1726	2.99596	0.0735	3.70415	0.003019	2.17828	0.588066		0.000938	2.38867		2548	50.0208	71.9	2.66328	19.43	0.42324	18.95	0.452653	2.53298			9530	27.4	23200	110900	224000	24900	96200	19900	3250	1820	7600	1051	2000	208	868	116.3
MA11_5_7	7	15138	88167			21.8	5270	19200	3.54484		0.0974	3.39944	0.034	4.01702	0.002544	2.14015	0.532771		0.000787	2.40394		1500	63.639	33.9	1.36177	16.38	0.350557	15.9	0.382226	3.01887			7880	26.5	21100	104200	221000	24900	94700	18700	3170	1670	6940	957	1656	190	727	95.8
MA11_5_8	8	15134	88180			23.25	7290	18380	2.43427		0.224	3.29079	0.0869	4.02449	0.002745	2.31673	0.575658		0.00088	2.5717		2950	52.8553	84.2	3.38862	17.67	0.409366	17.78	0.457248	0.618673			8340	24.9	19800	105400	216000	26200	99880	19800	3490	1660	7120	901	1453	153.2	564	77
MA11_5_9	9	15126	88198			15.98	4910	13240	2.56608		0.147	3.75824	0.0504	4.49611	0.002562	2.46792	0.548901		0.00084	2.7299		2240	64.4987	49.8	2.23906	16.49	0.40696	16.96	0.462992	2.77123			9200	24.4	20600	106100	234000	26000	99630	20000	4040	1651	6840	974	1600	161	615	80
MA11_5_10	10	15117	88195			18.95	3439	14290	4.03877		0.104	3.58544	0.0451	4.40453	0.00301	2.55822	0.580816		0.000891	2.6088		1770	66.0766	44.7	1.96882	19.34	0.49476	18	0.469584	7.44444			9310	28.6	26500	113600	236000	27000	97300	18700	3460	1700	7780	1104	1870	217	822	106.6
MA11_5_11	11	15109	88187			28.41	4090	22660	5.7971		0.129	3.64932	0.0532	4.3002	0.002977	2.27468	0.528972		0.000876	2.48374		2040	64.2025	52.5	2.2576	19.16	0.435829	17.7	0.439621	8.24859			9520	26.7	26000	108800	237000	27200	102100	20000	3430	1784	7600	1113	1990	238	899	117.4
MA11_5_12	12	15104	88179			31	3510	25380	7.61615		0.141	4.17425	0.061	5.09902	0.00299	2.92842	0.574309		0.000854	2.90683		2260	72.1895	60	3.05941	19.3	0.565184	17.25	0.501428	11.8841			9550	21.6	25700	112600	229000	26900	101200	19800	3140	1760	7610	1108	1960	223	850	112.7
MA11_5_13	13	15113	88141			41	11360	31140	3.0012		0.0585	2.33714	0.02275	3.20234	0.002838	2.18923	0.683636		0.000914	2.44323		550	51.042	22.84	0.731414	18.27	0.399973	18.47	0.451264	1.08284			10700	39.8	9590	115100	232000	27800	101700	19800	3540	1421	4380	435	572	37.7	99.8	12.1
MA11_5_14	14	15117	88150			48.3	12340	37800	3.35458		0.0587	2.37171	0.02258	3.15713	0.002754	2.08385	0.660047		0.000902	2.3797		565	51.7317	22.67	0.71572	17.73	0.369467	18.27	0.434771	2.95567			12370	47	11860	113900	235000	27200	90600	19500	3630	1478	4660	494	657	51.7	154	20.8
MA11_5_15	15	15120	88158			45.8	10040	36640	4.02091		0.0593	2.53851	0.02301	3.27941	0.002816	2.07616	0.633091		0.000894	2.31134		572	55.1633	23.1	0.757543	18.13	0.376408	18.07	0.417659	0.332042			11380	38.5	15430	106800	223000	26100	96000	19800	3420	1424	5140	657	962	98.3	354	44.5
MA11_5_16	16	15126	88152			40.74	5580	34900	6.92233		0.0618	2.66899	0.02223	3.40314	0.002615	2.11137	0.620418		0.00082	2.36334		644	57.1434	22.32	0.759581	16.84	0.355554	16.57	0.391605	1.62945			10230	22.7	26400	116400	227000	25600	95900	18660	3120	1765	7820	1132	2100	238	928	129.3
MA11_5_17	17	15124	88166			43.03	6100	37290	6.64894		0.0589	2.70457	0.0223	3.41875	0.002697	2.0912	0.611687		0.0008381	2.27099		553	58.9181	22.39	0.765457	17.36	0.363033	16.93	0.384478	2.53987			9450	23.4	24000	112000	225000	26100	98500	19130	3140	1742	7210	1077	1825	223	814	108.3
MA11_5_18	18	15123	88144			43	5020	36780	7.73395		0.0593	2.73054	0.0228	3.5034	0.002749	2.19499	0.626531		0.000845	2.42765		570	59.3362	22.8	0.798776	17.69	0.388293	17.06	0.414157	3.69285			9330	23.6	24300	103000	213000	25700	98700	18770	3110	1732	7310	1069	1930	213	803	108.2
MA11_8_1	1	6051	74970	Off target?																										#DIV/0!
MA11_8_2	2	6042	74973			6.61	158	620	5.24659		0.642	2.78516	0.981	4.16171	0.01109	3.09236	0.74305		0.0031	3.78452		4606	40.2662	692	28.799	71.1	2.19867	62.5	2.36532	13.76			158000	780	10800	60000	128000	14700	61000	9800	1880	840	3180	400	720	80	260	26
MA11_8_3	3	6021	74948			51.3	8620	40200	4.96278		0.1026	3.07861	0.0403	3.79774	0.002871	2.22374	0.585543		0.000918	2.3736		1640	56.9167	40	1.5191	18.48	0.410948	18.56	0.440541	0.431034			10460	29	32400	105200	213000	24500	92600	19400	3560	2070	9070	1285	2090	195	589	73.9
MA11_8_4	4	6015	74958			49.6	8450	40600	5.2173		0.0599	2.62922	0.0227	3.37158	0.002748	2.11063	0.626007		0.000886	2.36223		588	56.9251	22.8	0.768721	17.69	0.373371	17.89	0.422603	1.11794			11620	34.4	31300	110500	226000	26000	96200	18800	3590	2040	9350	1275	1973	201	600	69.7
MA11_8_5	5	6041	74964			45.2	7760	35800	5.06329		0.0613	2.51784	0.02438	3.34164	0.002891	2.19705	0.657478		0.000907	2.44634		643	54.0628	24.45	0.817031	18.61	0.408872	18.33	0.448414	1.52755			10540	36.9	14700	123100	233000	27000	105500	19500	3210	1541	5520	705	1060	104.5	378	51.3
MA11_8_6	6	6042	74955			45.6	9720	32200	3.66166		0.132	2.364	0.0559	3.15632	0.0031	2.09138	0.662601		0.000999	2.32409		2125	41.4016	55.2	1.74229	19.95	0.41723	20.19	0.469234	1.18871			11230	38.9	17700	115200	218000	25900	97100	18700	3250	1720	6250	780	1060	78.3	220	26.7
MA11_8_7	7	6036	74948			41.2	8120	29200	3.96825		0.1413	2.43502	0.0618	3.19947	0.003175	2.07541	0.648672		0.000998	2.40907		2250	42.0945	60.8	1.94528	20.43	0.424006	20.17	0.485909	1.28904			10680	40	18200	112400	226000	25800	93400	18800	3270	1700	6850	797	1210	105.1	303	39.1
MA11_8_8	8	6002	74927			33.7	8170	26400	3.64564		0.0574	2.69202	0.0221	3.48174	0.00277	2.20807	0.634185		0.000895	2.45177		509	59.2107	22.19	0.772599	17.83	0.393698	18.07	0.443035	1.32817			10120	29.6	29700	111200	219000	26500	98400	19100	3570	2110	8800	1220	1920	182	527	65.9
MA11_8_9	9	5989	74946			32	10360	24490	2.61438		0.0746	2.51458	0.0292	3.34253	0.002858	2.20214	0.658823		0.00092	2.4406		1043	50.6227	29.2	0.976019	18.4	0.405193	18.59	0.453707	1.02205			10710	33	26500	106900	215000	25500	96400	21400	3890	2230	9810	1169	1600	122.5	320	37.9
MA11_8_10	10	6025	74957			26.6	5840	19180	3.58295		0.0893	2.77836	0.0384	3.54248	0.003093	2.1977	0.620384		0.000976	2.41749		1414	53.1698	38.2	1.35323	19.91	0.437561	19.71	0.476487	1.01471			10210	30.8	27000	99810	208000	24300	86900	17000	3460	1920	9050	1176	1850	167	552	64.6
MA11_8_11	11	6012	74950			31.88	7580	24970	3.48311		0.0664	2.55993	0.02562	3.30108	0.00282	2.0842	0.631369		0.000896	2.3585		801	53.4754	25.68	0.847718	18.15	0.378283	18.1	0.426888	0.276243			11120	34.6	27200	105500	214000	25100	94000	18400	3600	1980	8540	1187	1890	183	520	66.5
MA11_8_12	12	6006	74970			28.69	8140	22500	2.81215		0.0721	4.03453	0.0286	4.58996	0.002789	2.18868	0.47684		0.000896	2.33471		1010	82.0753	28.5	1.30814	17.96	0.393087	18.1	0.422583	0.773481			10020	35.8	21600	112700	229000	24800	99870	18400	3470	1970	7820	940	1393	129	395	52.8
MA11_26_1	1	12340	71060			5.89	2330	3800	1.30548		0.333	2.67281	0.137	3.65338	0.002988	2.49063	0.681735		0.001162	2.88148		3618	40.9316	131.2	4.79323	19.23	0.478949	23.5	0.677148	18.1702			8500	25.3	14650	103700	221000	25000	96800	19500	3410	1503	5270	689	1142	117	415	54.1
MA11_26_2	2	12341	71072			5.22	2140	3520	1.33458		0.205	3.09539	0.0758	3.8983	0.002752	2.36966	0.60787		0.001058	2.70336		2824	50.3384	74	2.88474	17.72	0.419904	21.37	0.577707	17.08			8740	24.7	15030	94100	202000	22600	86100	16700	3100	1268	4960	677	1158	128	482	59.4
MA11_26_3	3	12341	71087			10.29	2660	7050	2.21239		0.1495	2.81465	0.0616	3.62218	0.003033	2.2799	0.629427		0.001041	2.3734		2328	48.1584	60.6	2.19504	19.52	0.445037	21.03	0.499127	7.18022			9400	27.5	22400	107300	223000	24400	88500	17600	3420	1564	6970	1041	1920	195	721	100.3
MA11_26_4	4	12341	71103			16.85	5160	12370	2.04123		0.1058	2.5956	0.0424	3.38446	0.002955	2.17196	0.641745		0.000976	2.35306		1712	47.6449	42.2	1.42824	19.02	0.413107	19.71	0.463788	3.50076			10310	31.7	23000	107500	209000	23000	92700	17350	3350	1527	6480	980	1740	194	650	85.9
MA11_26_5	5	12335	71117			22.41	8420	17450	1.77305		0.0666	2.67281	0.0262	3.45099	0.002826	2.18299	0.632569		0.000916	2.4199		815	55.7775	26.3	0.907611	18.19	0.397086	18.51	0.447923	1.7288			9490	29.6	23600	115600	227000	26500	102000	20800	3660	1990	7780	1053	1710	168	553	63.5
MA11_26_6	6	12330	71132			25.46	6759	17690	2.32937		0.183	2.83703	0.0848	3.55914	0.003355	2.14913	0.603834		0.001034	2.37573		2697	46.9289	82.6	2.93985	21.59	0.463997	20.88	0.496053	3.40038			8950	29.2	25500	109700	216000	25300	91400	17850	3380	1636	7400	1105	2050	226	806	112.5
MA11_26_7	7	12320	71134			25.05	8450	20080	2.19154		0.0582	2.64954	0.02239	3.37725	0.002808	2.09421	0.620095		0.000905	2.33162		543	57.9753	22.48	0.759205	18.08	0.378634	18.29	0.426454	1.14817			9650	29.7	26600	110400	204000	25400	90900	17600	3450	1710	7530	1213	2140	243	840	106.1
MA11_26_8	8	12311	71127			27.08	8400	21720	2.42424		0.0597	2.53428	0.02241	3.30501	0.002732	2.12145	0.641888		0.000889	2.40827		576	54.9363	22.5	0.743628	17.59	0.373163	17.95	0.432285	2.00557			9920	30.8	28000	105500	216000	25400	92200	17800	3510	1670	7570	1231	2170	250	881	125
MA11_26_9	9	12301	71121			25.53	4340	21190	4.65549		0.0691	2.80552	0.027	3.54204	0.002857	2.1622	0.610438		0.00087	2.41642		887	57.846	27.1	0.959893	18.39	0.397628	17.59	0.425048	4.54804			7750	24.3	23400	107800	218000	23600	96800	17700	3110	1538	7210	1041	1870	224	831	105.4
MA11_26_10	10	12297	71112			26.39	4470	21810	4.83092		0.0652	2.93396	0.0255	3.68421	0.002843	2.22829	0.604822		0.000876	2.48374		730	61.6645	25.5	0.939472	18.3	0.407777	17.7	0.439621	3.38983			8890	26.3	24300	109000	220000	26100	99000	19500	3130	1680	7030	1140	1880	222.2	836	110.1
MA11_26_11	11	12305	71102			37.3	10300	28300	2.87522		0.1135	3.08148	0.0467	3.76978	0.002903	2.17157	0.576046		0.00094	2.45383		1840	55.6792	46.2	1.74164	18.69	0.405866	19	0.466228	1.63158			10790	33.1	29800	110900	227000	25300	96000	19000	3560	1690	7890	1246	2290	276	953	122.8
MA11_26_12	12	12315	71090			34	5410	28170	5.51572		0.0646	2.69532	0.0249	3.48802	0.002784	2.21393	0.634725		0.000859	2.37272		776	56.8269	24.9	0.868516	17.92	0.396737	17.36	0.411904	3.22581			9170	28.5	23900	104400	221500	24400	95200	17470	3370	1650	7490	1135	2010	244	951	128.4
MA11_26_13	13	12325	71080			36.9	7000	29900	4.46229		0.0641	2.75829	0.0244	3.55575	0.002797	2.24392	0.631067		0.000889	2.45454		728	58.3091	24.4	0.867602	18	0.403905	17.96	0.440835	0.222717			10270	31.9	20600	110800	211000	26400	94300	17600	3130	1480	6260	933	1620	187	714	84.5
MA11_26_14	14	12330	71067			30.27	7370	24800	3.54862		0.176	3.08058	0.0702	3.88316	0.002853	2.36409	0.608806		0.000878	2.50557		2580	51.2723	68.7	2.66773	18.36	0.434047	17.73	0.444238	3.5533			9040	26.6	23100	109500	226000	28400	99890	18400	3200	1590	6860	1003	1745	196	710	98.4
MA11_26_15	15	12330	71093			39.7	6990	31800	4.73485		0.0633	2.62173	0.02411	3.36952	0.002767	2.11664	0.628173		0.0009	2.35702		696	55.6627	24.19	0.815087	17.81	0.376974	18.18	0.428507	2.0352			9580	27.9	24700	105300	208200	23300	93000	16990	3240	1623	7350	1078	1830	223	818	106.3
MA11_26_16	16	12324	71102			39.4	5200	31500	6.33714		0.0696	2.72152	0.0264	3.5131	0.002787	2.22153	0.632357		0.00088	2.38842		921	55.9842	26.5	0.930972	17.94	0.398543	17.77	0.424422	0.956669			8980	28.9	25300	111300	221000	26200	97300	18400	3340	1740	7230	1082	1950	239	956	117.7
MA11_26_17	17	12314	71111			40.8	9860	31850	3.33778		0.0579	2.51968	0.02201	3.34818	0.002739	2.20489	0.658532		0.000898	2.40452		530	55.2402	22.1	0.739948	17.63	0.388721	18.14	0.436181	2.81147			10410	33.9	26800	108700	217000	25400	92800	18500	3670	1680	7320	1137	2070	243	907	111.9
MA11_26_18	18	12323	71117			40.12	12210	31560	2.65957		0.0591	2.47315	0.02222	3.30113	0.002697	2.18655	0.662363		0.000891	2.43063		568	53.8096	22.31	0.736482	17.36	0.379585	17.99	0.437271	3.50195			9910	34.8	17200	114200	225000	26100	100100	20300	3570	1620	6010	749	1049	92	289	38.4
MA11_22_1	1	20532	89356			27.58	4910	23640	4.81232		0.0813	2.60903	0.0293	3.46854	0.002571	2.28555	0.658936		0.000815	2.46696		1222	51.2206	29.3	1.01628	16.55	0.378258	16.46	0.406062	0.54678			9140	24.6	22000	109900	218000	25000	92700	18500	3170	1578	6970	1018	1920	205	837	113.6
MA11_22_2	2	20526	89366			41.26	7520	33940	4.50857		0.0605	2.65361	0.02153	3.45647	0.00258	2.21484	0.640781		0.000846	2.37799		623	57.2466	21.62	0.747288	16.61	0.367884	17.09	0.406399	2.80866			9120	27.9	23800	107700	225000	26700	99840	18400	3210	1680	7290	1044	1990	247	958	126.9
MA11_22_3	3	20535	89373			15.67	2984	13220	4.40335		0.0958	2.99685	0.0348	3.76106	0.002638	2.27254	0.604229		0.000845	2.4519		1540	56.3321	34.7	1.30509	16.98	0.385878	17.08	0.418785	0.58548			8600	24.4	23000	108200	223000	24800	93300	18000	3010	1560	6710	979	1800	219	823	102.4
MA11_22_4	4	20533	89383			23.64	3985	20310	5.01505		0.087	2.90042	0.0321	3.7057	0.002634	2.30646	0.62241		0.000824	2.43757		1370	55.8905	32.1	1.18953	16.96	0.391176	16.65	0.405855	1.86186			9090	26.6	22400	113900	216000	24200	91400	18400	3080	1640	6960	997	1980	238	833	113.3
MA11_22_5	5	20588	89408			67.7	11690	55000	4.62535		0.0675	2.52014	0.0253	3.32928	0.002713	2.17554	0.653457		0.000874	2.36682		858	52.3591	25.37	0.844638	17.46	0.379849	17.66	0.41798	1.1325			13400	45.2	10760	120500	230000	24000	94600	17900	2920	1402	4400	523	677	61.3	214	25
MA11_22_6	6	20588	89396			96.8	15750	73600	4.62321		0.1005	2.43445	0.0406	3.33704	0.002932	2.28238	0.683953		0.000927	2.48143		1631	45.2294	40.4	1.34816	18.87	0.430684	18.73	0.464772	0.747464			17400	66.6	9450	117900	211000	23300	80800	16140	2900	1376	4240	414	478	33.5	86.9	10.8
MA11_22_7	7	20601	89399			73.1	13670	58500	4.21763		0.0649	2.38858	0.02386	3.22145	0.002693	2.16157	0.670994		0.000896	2.47397		761	50.2805	23.94	0.771215	17.33	0.374601	18.09	0.447541	4.20122			16200	54.7	14000	120100	215000	23100	85000	17000	3170	1626	5680	657	860	71.4	205	24.1
MA11_22_8	8	20599	89411			40.77	8120	33750	4.06504		0.0621	2.57326	0.02226	3.39644	0.002569	2.21678	0.65268		0.000865	2.34582		670	54.9997	22.35	0.759103	16.54	0.366656	17.48	0.41005	5.37757			9780	27.9	27300	110000	211000	25800	94900	18600	3370	1760	7820	1176	1970	208	766	90.2
MA11_22_9	9	20612	89413			31.69	5960	25910	4.22297		0.1682	2.52804	0.064	3.32977	0.002768	2.16711	0.650828		0.000892	2.40702		2555	42.387	63	2.09776	17.82	0.386179	18.01	0.433503	1.05497			8860	23.5	23600	104400	213000	24000	90100	18800	3400	1634	7260	1013	1830	209	803	97.4
MA11_22_10	10	20614	89400			55	8380	33570	3.92311		0.338	2.87569	0.188	3.90135	0.00394	2.63646	0.675782		0.001161	2.66473		3632	43.9695	174	6.78834	25.4	0.66966	23.46	0.625145	8.26939			16500	32.7	26100	106800	218000	24000	94100	20500	3530	1890	8140	1167	1770	174	559	70.9
MA11_22_11	11	20664	89416			27.53	5870	21310	3.59195		0.1732	2.8544	0.0685	3.56323	0.002833	2.13284	0.598569		0.000932	2.4133		2590	47.6305	67.8	2.41587	18.23	0.388817	18.84	0.454666	3.23779			9290	21.2	25100	98100	212000	23800	90000	19000	3430	1740	7540	1066	1900	217	755	101.9
MA11_22_12	12	20655	89419			22.56	5210	17070	3.20616		0.1664	2.95106	0.0647	3.78313	0.002801	2.36713	0.625708		0.000955	2.63286		2522	49.5678	63.5	2.40229	18.03	0.426794	19.29	0.507878	6.53188			9060	23.3	25500	106300	219000	24000	96200	18800	3470	1790	8140	1075	1840	187	665	82.5
MA11_22_13	13	20643	89421			24.71	5800	17330	2.94464		0.2007	2.77926	0.0818	3.69554	0.002925	2.43572	0.659097		0.001001	2.62623		2820	45.3369	79.8	2.94904	18.83	0.458646	20.23	0.531287	6.92042			9200	24.8	25900	99300	213000	23200	93300	19400	3640	1840	7870	1066	1810	182.9	608	78.3
MA11_22_14	14	20535	89281			34.95	9320	30860	3.26477		0.0564	2.53604	0.01928	3.37006	0.002456	2.21942	0.65857		0.000805	2.39565		460	56.153	19.38	0.653118	15.82	0.351112	16.27	0.389772	2.76583			10000	27.4	20900	115900	238000	27400	104400	21000	3810	1820	7470	939	1469	147.2	507	67
MA11_22_15	15	20540	89293			29.94	8830	28540	3.22477		0.0532	2.64564	0.01679	3.54387	0.002285	2.35788	0.66534		0.000739	2.53687		342	59.9371	16.9	0.598913	14.71	0.346844	14.92	0.378501	1.40751			8790	20.7	22400	108300	215000	25700	101500	18900	3330	1790	7240	1004	1667	193	697	84.6
MA11_22_16	16	20543	89306			29.67	8940	29620	3.27761		0.0539	2.56506	0.0168	3.31564	0.002231	2.10095	0.633647		0.000709	2.3859		390	57.8085	16.92	0.561007	14.37	0.301906	14.33	0.3419	0.279135			8440	20.6	18800	105900	222000	23800	92900	18000	3230	1581	6750	892	1539	182	690	86.4
MA11_22_17	17	20558	89311			34.21	8670	28770	3.31455		0.1605	2.62983	0.0586	3.43355	0.002622	2.20754	0.642932		0.000836	2.45632		2458	44.4414	57.7	1.98116	16.88	0.372632	16.89	0.414872	0.0592066			8070	22.2	21300	107000	216000	25800	101400	19500	3290	1621	6520	929	1599	176.3	680	87.4
MA11_22_18	18	20556	89297			49.89	10920	28540	2.61917		0.2451	2.20726	0.1179	3.17955	0.003493	2.28857	0.719778		0.001242	2.51693		3155	35.0327	113.1	3.59607	22.48	0.514471	25.1	0.63175	10.4382			9500	26	28700	105100	205000	24800	94900	20900	3800	2150	8860	1160	1640	138.7	396	48.8
MA11_22_19	19	20549	89282			41.2	11050	32800	2.97		0.0591	2.4387	0.02109	3.2665	0.002619	2.17319	0.665296		0.000885	2.40996		558	53.0601	21.19	0.692172	16.86	0.3664	17.88	0.430901	5.7047			11290	34.4	22700	112600	227000	25000	95700	21800	3850	2080	8330	995	1383	112.6	307	36.3
MA11_22_20	20	20561	89278			36.73	11330	29030	2.57732		0.0621	2.54177	0.02293	3.36084	0.002674	2.19878	0.654236		0.000908	2.35411		675	54.3268	23.02	0.773666	17.22	0.378631	18.34	0.431744	6.10687			9950	29.8	23800	108300	217000	24800	97200	19000	3650	2110	8240	1007	1356	117.3	310	33.9
MA11_22_21	21	20570	89291			35.3	9390	23470	2.53872		0.1671	2.43577	0.0714	3.29724	0.003075	2.22234	0.673999		0.00106	2.50283		2522	40.8842	70	2.30807	19.79	0.4398	21.42	0.536106	7.60971			29600	33.6	22200	98900	198000	23100	83700	19100	3490	1890	7580	977	1377	111.3	318	35.5
MA11_22_22	22	20570	89303			35.99	10900	27390	2.55428		0.1037	2.57199	0.0397	3.35138	0.00278	2.14863	0.641119		0.000932	2.4133		1676	47.4315	39.5	1.32379	17.9	0.384605	18.83	0.454425	4.93893			9740	27	27700	104300	210000	25400	96900	20100	3970	2200	8590	1127	1580	121.4	339	42
MA11_22_23	23	20571	89315			31.95	10610	27020	2.57998		0.0633	2.59143	0.02221	3.3998	0.00256	2.20071	0.647306		0.000843	2.40403		700	55.0193	22.3	0.758155	16.48	0.362677	17.02	0.409166	3.17274			10280	27.4	24900	105700	214200	26500	99100	21180	4030	2210	8910	1068	1590	140.4	398	50.7
MA11_22_24	24	20598	89216			18	3880	12600	3.37952		0.1906	2.61919	0.1	3.5034	0.003804	2.32673	0.664134		0.001009	2.56453		2744	43.0554	96.7	3.38779	24.47	0.56935	20.39	0.522907	20.0098			32900	35.6	20800	90300	176000	20200	78300	16000	3130	1570	7090	878	1334	124	382	44.4
MA11_22_25	25	20610	89210			11.5	2210	6980	3.26052		0.226	2.9987	0.139	3.88124	0.0044	2.46411	0.634876		0.001189	2.72915		3008	48.1058	131.9	5.11936	28.33	0.698081	24.01	0.65527	17.9925			92000	41.7	20500	67700	133400	16400	61000	15000	2730	1460	6850	891	1410	131	436	50.2
MA11_22_26	26	20613	89191			29.43	9960	23910	2.42542		0.0718	3.50613	0.0272	4.28285	0.00269	2.45964	0.574301		0.000886	2.65469		860	71.4185	27.2	1.16493	17.32	0.42601	17.89	0.474925	3.18614			10470	33.6	31000	108800	216000	24200	90900	19500	3800	2200	9490	1295	1990	168	476	65
MA11_22_27	27	20622	89179			20.4	5270	12060	2.31428		0.2377	2.71346	0.1128	3.62533	0.00346	2.4042	0.663167		0.001221	2.66687		3092	43.2383	108.4	3.92986	22.27	0.535415	24.66	0.65765	9.69181			63700	37.3	21400	69900	152100	17000	64100	13690	2580	1500	6390	864	1371	117.2	360	44.8
MA11_33_1	1	15390	83345			8.98	2700	7670	2.8082		0.144	3.40196	0.0497	4.1543	0.002433	2.3843	0.573936		0.00088	2.84445		2240	58.6045	49.1	2.03976	15.67	0.37362	17.78	0.505744	11.8673			9580	27.7	18500	99000	201000	24400	91400	17500	3190	1400	5430	788	1341	149	528	70.5
MA11_33_2	2	15383	83352			15.3	3870	13300	3.53357		0.0742	3.18014	0.0256	3.81361	0.002532	2.10482	0.551925		0.00083	2.35929		1010	64.126	25.7	0.980097	16.3	0.343086	16.77	0.395653	2.80262			8280	25	20900	101700	219000	25400	91800	17800	3020	1562	6440	963	1590	192	718	91.5
MA11_33_3	3	15368	83363			11.9	3430	10400	3.02206		0.1835	2.72694	0.0682	3.53058	0.002665	2.24251	0.635166		0.000842	2.47745		2666	45.0886	67	2.36549	17.16	0.384814	17	0.421167	0.941176			8650	22.8	20200	102600	223000	23300	100100	18000	3240	1590	6180	858	1530	156	617	86.3
MA11_33_4	4	15354	83368			7.16	1380	5130	3.70508		0.2378	2.67411	0.1088	3.61747	0.003251	2.43623	0.673463		0.000998	2.58948		3115	42.609	104.7	3.78749	20.92	0.509659	20.16	0.522039	3.76984			8800	21.7	21200	92500	205000	23400	91300	16400	2950	1530	6440	955	1800	214	683	101
MA11_33_5	5	15341	83373			8.1	1960	6900	3.38181		0.195	2.89279	0.0756	3.84295	0.002792	2.52983	0.658304		0.000872	2.68533		2788	47.39	73.9	2.83994	17.97	0.45461	17.62	0.473156	1.98638			11700	24.2	22000	100600	224000	24600	99600	20300	3280	1730	6630	976	1840	202	704	101.9
MA11_33_6	6	15351	83359			29.2	7450	24800	3.40136		0.0588	2.67424	0.02176	3.42502	0.002664	2.1399	0.624786		0.000858	2.34844		536	58.2938	21.85	0.748367	17.15	0.366994	17.33	0.406984	1.03866			9340	23.6	27000	106200	234000	26900	97800	18500	3780	1803	8430	1180	2250	249	913	127.9
MA11_33_7	7	15362	83353			29.2	8180	24290	3.04878		0.0572	2.72687	0.0214	3.35239	0.002739	1.95006	0.581692		0.0008698	2.24894		486	60.0561	21.49	0.720429	17.63	0.343796	17.57	0.395138	0.341491			8720	22.4	28300	103300	209000	23900	89400	18000	3350	1680	7660	1142	2120	229	805	105.1
MA11_33_8	8	15371	83348			28.81	7110	23950	3.41297		0.0576	2.72152	0.02173	3.32625	0.002737	1.9124	0.574941		0.0008629	2.2171		500	59.7813	21.82	0.725787	17.62	0.336964	17.43	0.38644	1.09007			9210	21.3	27400	108700	229000	27400	95600	18900	3550	1730	7740	1186	2150	224	935	120.5
MA11_33_9	9	15381	83340			29.7	6080	24960	4.15973		0.0598	2.66198	0.02277	3.30932	0.002768	1.96607	0.594101		0.0008566	2.20277		571	57.6695	22.85	0.756179	17.82	0.350354	17.31	0.3813	2.94627			7920	19.7	26100	107200	212000	23500	87900	17400	3080	1650	7120	1095	2070	224	877	115.2
MA11_33_10	10	15377	83331			25.7	7360	22200	3.03951		0.073	3.84016	0.0268	4.32921	0.002624	1.9988	0.4617		0.000847	2.35262		930	77.822	26.8	1.16023	16.89	0.337597	17.12	0.402769	1.34346			9790	22	26500	113200	214000	25700	96200	18900	3490	1820	7700	1120	1970	217	748	99.9
MA11_33_11	11	15368	83336			31.1	9440	25210	2.71003		0.0552	2.36539	0.02137	3.01537	0.002799	1.87012	0.620198		0.0008804	2.19495		409	52.811	21.47	0.647399	18.02	0.336996	17.79	0.390482	1.29286			9730	20.8	29700	107600	217000	25500	88400	18600	3700	1950	8730	1254	1983	199	722	86.9
MA11_33_12	12	15357	83342			29.9	6310	24050	3.82848		0.074	2.72565	0.0291	3.34116	0.002843	1.9324	0.578362		0.0008897	2.18273		1017	55.0066	29.1	0.972278	18.3	0.35363	17.98	0.392455	1.77976			9290	17.5	27000	105300	215400	24500	91000	17500	3460	1670	7620	1110	1970	230	849	117.9
																																				111558	227527	26311.1	98559.6	19141.6	3430.89	1665.49	6869.33	944.956	1561.04	164.147	581.509	74.5042
																																				0.367	0.957	0.137	0.711	0.231	0.087	0.058	0.381	0.085	0.249	0.036	0.248	0.038
																																				303972	237750	192052	138621	82863.9	39435.5	28715.3	18029.7	11117.1	6269.25	4559.63	2344.79	1960.64
MA21_3_1	1	19515	28736			970	6010	31220	5.23013		0.05744	2.07412	0.572	3.10933	0.0727	2.31645	0.745		0.02212	2.58211		508	45.6081	459	14.2718	452	10.4703	442	11.4129	2.26244			9000	26.1	19400	111100	219000	26700	99500	21500	1358	1840	7010	838	1348	149.3	494	64.9
MA21_3_2	2	19520	28747			762	6160	26400	4.28082		0.05827	1.92887	0.543	2.97034	0.0678	2.25885	0.760468		0.0207	2.49444		539	42.1871	439.9	13.0665	422.6	9.54589	414	10.327	2.07729			7890	23.2	20100	113100	238000	28200	107700	24000	1460	2110	7870	969	1500	165	525	70.3
MA21_3_3	3	19527	28733			871	7600	28380	3.69822		0.05763	2.0052	0.562	2.95622	0.0711	2.17219	0.734786		0.02237	2.41512		518	44.038	453.8	13.4153	442.6	9.61411	447.1	10.798	1.00649			6880	22	17800	93500	217000	25200	93100	22200	1281	1840	6290	753	1280	141	481	56.2
MA21_3_4	4	19530	28744			884	7560	28720	3.72995		0.05756	1.93938	0.565	2.91286	0.0709	2.17338	0.746131		0.0224	2.43303		515	42.6118	454.3	13.2331	441.4	9.59329	447.7	10.8927	1.40719			7320	23.5	18300	103000	232000	25700	95200	22500	1331	1980	6890	842	1311	144.2	497	56.1
MA21_3_5	5	19533	28756			1897	7800	61200	7.59878		0.05818	1.96438	0.5824	2.87434	0.0727	2.09835	0.730028		0.0224	2.34901		538	42.9885	465.8	13.3887	452.5	9.49503	447.7	10.5165	1.07215			10320	21.1	17700	107500	233000	27000	99400	22100	658	1910	6920	735	925	60.3	133	11.9
MA21_3_6	6	19525	28752			911	7110	30100	4.17188		0.05778	1.983	0.553	2.94744	0.0697	2.18063	0.739837		0.02173	2.43574		523	43.5079	447	13.1751	434.6	9.47701	434.5	10.5833	0.023015			7740	21.6	17600	106000	219000	27000	99630	22100	1267	1820	6470	792	1325	138.2	487	58.3
MA21_3_7	7	19557	28759			228.9	2830	7750	2.77316		0.06357	2.05695	0.55	3.21584	0.0621	2.47197	0.768683		0.02149	2.77897		729	43.6073	447	14.3748	388	9.59122	430	11.9496	9.76744			5790	22	18300	99200	204000	24100	85000	21700	1309	1690	6350	749	1189	201	1170	258
MA21_3_8	8	19545	28761			88	5370	11100	2.00401		0.0754	2.37219	0.1364	3.46492	0.0129	2.52554	0.72889		0.0056	2.81577		1074	47.6029	129.7	4.494	82.6	2.0861	112.9	3.17901	26.8379			8580	22.7	19100	85300	204000	21300	79100	17800	1059	1750	6720	672	1001	112.2	593	139
MA21_3_9	9	19539	28735			933	9120	34900	3.76223		0.0575	1.95292	0.4879	2.9137	0.0616	2.16234	0.742129		0.01925	2.4013		510	42.9262	403.3	11.7509	385.4	8.33366	385.5	9.25701	0.0259403			6820	30.5	17200	105900	227000	27600	97700	22100	1426	1770	6310	740	1161	121.3	413	48.6
MA21_3_10	10	19547	28743			527	11950	41700	3.46021		0.0585	2.22473	0.224	3.93041	0.0276	3.24017	0.824385		0.00924	3.38637		547	48.5869	205	8.05733	175	5.6703	186	6.29866	5.91398			8450	25.4	22000	104200	221000	26600	94600	21200	1432	2270	8430	826	1104	85.9	223	26.9
MA21_3_11	11	19540	28746			1411	9710	49200	5.01002		0.05753	1.95729	0.522	2.92504	0.0654	2.17367	0.743127		0.02034	2.38151		511	43.0138	426.3	12.4694	408.3	8.87511	406.9	9.69036	0.344065			9120	25.8	17300	113400	224000	25900	93800	20600	1157	1540	5460	671	1164	118.3	408	49.8
MA21_4_1	1	18664	27381			1151	36890	36500	0.990393		0.05773	1.9656	0.551	2.91423	0.069	2.15154	0.738289		0.02226	2.37007		519	43.1402	445.5	12.9829	430	9.25163	444.9	10.5445	3.34907			9900	31.2	18000	112900	224000	25300	89300	22100	975	1750	6500	772	1269	138	475	57.3
MA21_4_2	2	18668	27390			1013	27620	32570	1.18483		0.05667	1.90941	0.572	3.04682	0.0728	2.37429	0.779268		0.02231	2.50718		478.3	42.2013	459	13.9849	453	10.7555	446	11.182	1.56951			9240	39.4	17900	111900	220000	25400	94700	19800	1362	1556	6440	758	1276	138.4	477	58.3
MA21_4_3	3	18670	27400			1139	34500	37600	1.08319		0.05683	1.91372	0.539	2.90596	0.0687	2.18684	0.752538		0.02146	2.44072		486.3	42.2511	437.6	12.7165	428.2	9.36406	429.2	10.4756	0.232992			10350	39.6	19600	113800	222000	26000	92900	20800	1243	1770	6790	830	1358	143.3	508	56.7
MA21_4_4	4	18670	27412			1029	23870	42600	1.78699		0.05656	1.9463	0.4669	2.91849	0.0598	2.17473	0.745158		0.0172	2.38454		474	43.0485	388.9	11.35	374.5	8.14438	344.7	8.21952	8.6452			11010	34.6	20300	117000	236000	27500	100100	22600	950	1900	7380	837	1390	151	498	66.1
MA21_4_5	5	18670	27425			44.9	16320	31600	1.92678		0.132	2.4428	0.0522	3.35841	0.002808	2.3047	0.686248		0.001009	2.48604		2125	42.7817	51.6	1.73294	18.07	0.41646	20.39	0.506903	11.3781			10460	29.1	19600	100200	223000	23300	88700	21800	1031	1860	6330	798	1350	145	516	62.3
MA21_4_6	6	18665	27430			30.1	14200	26900	1.89		0.1152	2.9066	0.0363	3.67552	0.002303	2.24968	0.612073		0.000823	2.62986		1877	52.35	36.1	1.32686	14.83	0.333628	16.63	0.437346	10.8238			11000	29.7	16600	104300	210000	24200	94300	19700	1122	1640	5740	707	1160	124	451	56.8
MA21_4_7	7	18657	27426			28.8	17160	28200	1.62946		0.0878	2.68818	0.02556	3.50648	0.002111	2.25146	0.642085		0.000736	2.51193		1371	51.6746	25.62	0.89836	13.59	0.305973	14.87	0.373524	8.60794			11600	43.4	17000	113400	237000	25200	92600	20600	1367	1750	6160	671	1108	111.3	374	48.7
MA21_4_8	8	18651	27418			232.7	29440	42930	1.45012		0.05953	2.08132	0.089	3.53136	0.01086	2.85283	0.807855		0.00395	3.01053		586	45.1643	86.6	3.05816	69.6	1.98557	79.6	2.39638	12.5628			11630	42	16880	118100	233000	27100	96800	21600	1316	1810	5970	712	1167	118.2	403	55.8
MA21_4_9	9	18656	27411			1158	24620	37470	1.51217		0.05686	1.9365	0.557	2.93555	0.0708	2.20622	0.751553		0.02226	2.417		486	42.7455	449	13.1806	440.6	9.7206	444.9	10.7532	0.966509			9440	33.3	19900	103800	221000	24700	99880	21400	940	1910	7210	882	1465	158	512	65.3
MA21_4_10	10	18663	27421			586	13760	39990	2.89771		0.05573	1.98941	0.363	3.06345	0.0473	2.32959	0.760446		0.01049	2.7952		444	44.2523	314.3	9.62843	297.8	6.93752	211	5.89788	41.1374			8710	29.9	21900	100500	215000	25300	90700	21300	818	1900	7280	902	1445	122.9	411	48.3
MA21_4_11	11	18661	27402			1086	31670	34200	1.0644		0.05639	1.94673	0.556	2.94136	0.071	2.20496	0.749639		0.0227	2.47276		467	43.1074	448.5	13.192	442.2	9.75032	453.7	11.2189	2.53471			10490	37.2	18700	106200	226000	25700	94400	18450	1071	1760	6580	787	1352	141.8	494	59.6
MA21_4_12	12	18658	27393			1027	9480	32290	3.42818		0.05661	1.95071	0.617	2.91182	0.0785	2.16181	0.742426		0.02286	2.42508		476	43.1315	487.7	14.201	487.1	10.5302	456.9	11.0802	6.60976			7970	65.6	15500	107100	234000	25400	105800	18700	2230	1560	5680	691	1092	115.4	350	39.8
MA21_4_13	13	18654	27385			910	27760	30340	1.08648		0.05638	1.90996	0.531	2.95536	0.0683	2.25526	0.763109		0.02129	2.50092		468.6	42.2961	432.1	12.7701	425.8	9.60289	425.8	10.6489	0			10350	49.9	19300	110300	230000	26400	95600	21700	1392	1790	6830	811	1337	143	511	63.5
MA21_4_14	14	18644	27383			943	33600	30490	0.903342		0.05643	1.94207	0.5481	2.91779	0.0702	2.17758	0.746312		0.02223	2.38944		469	42.9926	443.6	12.9433	437.3	9.52255	444.5	10.621	1.6198			11350	35.4	18100	105900	213000	24100	89700	19300	1097	1734	6540	792	1281	148	507	62.8
MA21_4_15	15	18646	27393			648	26390	23630	0.891742		0.05613	1.91974	0.494	2.93479	0.0638	2.21982	0.756382		0.01979	2.43314		457	42.5851	407.3	11.9534	398.5	8.846	396.1	9.63766	0.605908			9480	42.4	18600	118000	228000	25700	93000	18600	1088	1630	6130	760	1237	130	459	54.6
MA21_9_1	1	20090	30219			52.1	14380	38090	2.6455		0.0544	2.4862	0.02239	3.2987	0.002983	2.16801	0.657231		0.000984	2.45612		374	55.8267	22.48	0.741548	19.2	0.416258	19.88	0.488276	3.42052			9670	33.2	25100	110700	229000	27900	102500	20600	1119	2110	8610	1041	1600	142.9	378	44.8
MA21_9_2	2	20100	30223			52.8	10900	39100	3.58038		0.0553	2.5128	0.02251	3.37984	0.002929	2.26035	0.668774		0.000966	2.46382		444	56.0625	22.6	0.763844	18.85	0.426076	19.52	0.480937	3.43238			9850	30.9	26300	112200	232000	27300	102600	20200	987	2130	8840	1086	1530	123.5	359	36.8
MA21_9_3	3	20110	30226			50.8	15100	39500	2.63435		0.0544	2.41113	0.02232	3.2335	0.002968	2.15454	0.666316		0.000909	2.40004		385	54.141	22.41	0.724628	19.11	0.411732	18.37	0.440887	4.02831			10250	29.2	26800	98400	223000	25500	95700	20480	1019	2180	8510	1097	1660	146	425	47.2
MA21_9_4	4	20117	30234			48.8	18200	36700	2.0016		0.0519	2.31505	0.02119	3.24319	0.002909	2.2713	0.70033		0.000938	2.51901		276	52.978	21.29	0.690475	18.72	0.425188	18.95	0.477353	1.21372			11030	34.4	30900	115100	240000	28200	104200	21500	1181	2120	8610	1168	1800	161	500	58.8
MA21_9_5	5	20119	30242			298	9460	30700	3.24675		0.0575	2.84773	0.0854	3.8422	0.01063	2.57933	0.671316		0.00685	3.06618		500	62.5945	84.8	3.25819	68.1	1.75652	137.9	4.22826	50.6164			7830	36.6	22100	113500	236000	27400	102900	20600	1830	1950	7630	940	1446	128.6	415	49.1
MA21_9_6	6	20118	30252			217.3	10500	31100	3.02206		0.0547	2.66066	0.0566	3.64124	0.0076	2.48585	0.682695		0.00494	2.76473		389	59.6151	55.9	2.03545	48.8	1.2131	99.6	2.75367	51.004			8680	29.5	23400	112500	239000	29100	110000	23400	1250	2360	8130	941	1494	138.6	415	45.8
MA21_9_7	7	20117	30263			1153	6020	36700	6.06796		0.05799	2.02965	0.578	2.99096	0.0723	2.1969	0.734514		0.02243	2.39557		532	44.471	462.9	13.8452	449.9	9.88386	448.3	10.7393	0.356904			9500	42.9	19000	115700	247000	29900	114800	22700	923	1810	6540	815	1471	151.1	514	61
MA21_9_8	8	20112	30271			825	4380	27300	6.29723		0.0586	2.37257	0.474	3.93597	0.0588	3.14051	0.797899		0.0211	3.33302		550	51.783	394	15.5077	368	11.5571	421	14.032	12.5891			8360	28.6	17320	109800	225000	26400	99690	20900	645	1740	5990	806	1256	132.5	466	57.8
MA21_9_9	9	20103	30272			45.6	19510	37410	1.92012		0.0617	2.87477	0.0234	3.7705	0.002743	2.43974	0.647061		0.000887	2.7582		650	61.5845	23.5	0.886067	17.66	0.430858	17.92	0.494269	1.45089			10170	27.4	23700	110700	234000	27700	98700	22100	737	2130	8110	982	1620	143.2	423	54.5
MA21_9_10	10	20093	30271			76.9	16410	33400	2.06058		0.0561	2.43183	0.0353	3.53774	0.00458	2.56939	0.726282		0.001628	2.9442		445	53.9558	35.2	1.24528	29.5	0.757972	32.9	0.968641	10.3343			9440	26.7	26100	103000	232000	25800	96600	22100	787	2310	8570	1035	1480	135.7	409	43.7
MA21_9_11	11	20096	30263			677	5460	21070	3.7037		0.05849	2.18212	0.555	3.35469	0.0694	2.548	0.759534		0.02243	2.72633		547	47.6594	448	15.029	433	11.0328	448	12.214	3.34821			8090	52.5	18500	123400	246000	27600	102400	19000	1820	1630	6090	803	1396	139.3	444	48.6
MA21_9_12	12	20094	30255			729	8630	22280	2.50125		0.05838	1.99413	0.575	2.96924	0.0718	2.19997	0.740918		0.02294	2.44165		546	43.584	462.4	13.7298	447	9.83386	458.4	11.1925	2.48691			7720	57.1	18000	112100	232000	26300	96400	18700	2390	1570	6050	773	1345	148	491	57.1
MA21_9_13	13	20087	30251			961	5900	31100	5.11509		0.05777	2.05167	0.572	3.09828	0.072	2.32164	0.74933		0.02167	2.4557		523	45.0176	458	14.1901	448	10.4009	433.2	10.6381	3.41644			8300	45	18100	112500	235000	28500	103300	21600	972	1570	6010	762	1284	128.6	452	54.9
MA21_9_14	14	20078	30248			77.4	11790	31760	2.53678		0.0594	2.36578	0.0401	3.56542	0.00497	2.66746	0.748147		0.001701	2.83839		577	51.378	39.9	1.4226	32	0.853588	34.4	0.976405	6.97674			9680	32.8	26100	97100	215000	24400	98200	23700	742	2670	9050	994	1409	118.3	313	31.1
MA21_9_15	15	20080	30239			222	13390	37390	2.62812		0.0666	2.52847	0.0784	3.6128	0.00849	2.58053	0.714275		0.0043	2.82019		820	52.7654	76.6	2.7674	54.5	1.40639	86.7	2.44511	37.1396			9310	96.5	8300	110300	248000	28100	106900	21400	1630	1126	3500	366	560	47.9	168	20.5
MA21_9_16	16	20083	30229			394	17150	32800	1.77968		0.0575	2.2314	0.1132	3.74072	0.01437	3.00231	0.802602		0.00872	3.13825		509	49.0472	108.8	4.06991	92	2.76213	175	5.49194	47.4286			9800	63.6	19500	111300	226000	26000	107400	19600	1349	1716	6600	812	1283	121	399	44.9
MA21_9_17	17	20092	30231			926	7150	30030	3.85802		0.05784	2.0131	0.558	2.98757	0.0706	2.20749	0.73889		0.02206	2.39219		526	44.1513	449.6	13.4321	439.6	9.70412	441	10.5496	0.31746			9840	51	16450	106800	220000	27700	102100	19800	1015	1620	5940	760	1229	127.5	445	51.2
MA21_9_18	18	20103	30234			892	6030	28000	4.2735		0.05762	1.95262	0.581	2.93474	0.0733	2.19088	0.746534		0.02265	2.41957		517	42.8859	464.7	13.6377	456.2	9.9948	452.7	10.9534	0.773139			7780	53.9	15610	109300	217000	26000	100800	19600	963	1560	5770	690	1151	113.4	403	47.5
MA21_9_19	19	20109	30243			481	4390	14690	3.05157		0.05879	2.05586	0.598	3.06719	0.0742	2.2762	0.742113		0.02321	2.48077		558	44.817	475.3	14.5784	461	10.4933	464	11.5108	0.646552			5720	64.4	15500	116900	238000	27600	100500	18400	3520	1286	4820	679	1316	146	559	65.9
MA21_9_20	20	20110	30251			425	2610	12790	4.58926		0.05966	2.03596	0.614	3.04742	0.0755	2.26752	0.744079		0.02353	2.48343		590	44.1449	486	14.8105	469	10.6347	470	11.6721	0.212766			5240	63.5	16200	126700	256000	27700	100800	17900	3080	1149	4710	634	1315	166	612	76.3
MA21_9_21	21	20107	30260			619	6400	19570	2.8401		0.05741	2.04465	0.563	3.16808	0.0708	2.41994	0.763851		0.02227	2.59598		507	44.9689	453	14.3514	441	10.6719	445	11.5521	0.898876			7620	78	17900	117900	230000	25700	95500	18200	2150	1424	5580	759	1328	152	565	61.7
MA21_9_22	22	20102	30251			429	2711	13810	4.78698		0.05986	2.11176	0.588	3.18234	0.072	2.38071	0.7481		0.0224	2.54074		596	45.7326	469.4	14.9379	448	10.6656	448	11.3825	0			5740	76.4	21300	121300	254000	28800	91200	16400	3610	1286	5490	884	1896	237	845	100.3
MA21_9_23	23	20099	30243			652	5830	19910	3.26904		0.05794	1.99985	0.577	3.01651	0.0724	2.25831	0.748648		0.02316	2.473		530	43.8323	462.3	13.9453	450.7	10.1782	462.8	11.445	2.61452			7240	81.2	16100	120000	250000	29300	99540	20200	2140	1441	5450	722	1185	132	479	53.1
MA21_9_24	24	20090	30241			965	3360	30700	8.87311		0.05719	2.07524	0.585	3.12092	0.0747	2.33099	0.746892		0.022	2.50454		497	45.7078	467	14.5747	464	10.8158	439.8	11.015	5.5025			7650	45.8	15800	109300	225000	25200	95700	19100	531	1576	5820	743	1199	125.7	438	52
MA21_2_1	1	20397	43578			37.4	18800	30630	1.68379		0.0508	2.32494	0.01954	3.18454	0.002817	2.17622	0.683371		0.000875	2.41424		225	53.6796	19.65	0.625762	18.13	0.394549	17.68	0.426838	2.54525			9450	34.3	25400	99970	210000	25900	95000	21800	738	2340	8230	1040	1529	147.2	456	52.5
MA21_2_2	2	20411	43579			30.7	17700	26300	1.56006		0.0963	3.19334	0.0323	3.94771	0.002483	2.32099	0.587933		0.000839	2.45484		1500	59.9481	32.3	1.27511	15.99	0.371126	16.96	0.41634	5.71934			10170	51.7	17500	101800	210000	24100	91700	20300	980	1840	6470	782	1200	112.1	420	44.6
MA21_2_3	3	20415	43590			39.2	16830	32820	2.03335		0.0609	3.10547	0.0224	3.8914	0.002683	2.345	0.602611		0.000853	2.49548		610	66.8364	22.5	0.875564	17.27	0.404981	17.23	0.429972	0.232153			9770	33.5	21700	102600	213000	26000	90700	21500	803	2070	7970	949	1450	128.4	414	46.6
MA21_2_4	4	20421	43601			40.3	16100	36120	2.35183		0.0582	2.68177	0.0202	3.56633	0.002503	2.35092	0.659199		0.00079	2.60477		515	58.6805	20.3	0.723965	16.12	0.378969	15.95	0.41546	1.06583			9550	37	20400	107900	223000	25800	96800	20900	923	1920	7180	857	1340	131	395	45.8
MA21_2_5	5	20422	43612			38.4	15000	36000	2.49688		0.097	4.3248	0.0319	4.93494	0.002464	2.37692	0.481651		0.000782	2.70644		1340	81.044	31.8	1.56931	15.86	0.376979	15.8	0.427617	0.379747			9300	36.9	16700	104400	215000	25700	94900	19500	960	1780	6400	721	1110	108	351	40
MA21_2_6	6	20421	43622			21.3	8580	16600	2.0016		0.1289	2.97081	0.046	4.05695	0.00253	2.7628	0.681006		0.000938	2.91163		2068	52.2736	45.7	1.85402	16.28	0.449784	18.94	0.551463	14.0444			9400	43.8	15600	98300	211000	22000	79600	17100	1340	1540	5520	609	1070	94	300	34.7
MA21_2_7	7	20414	43632			38.5	15500	36200	2.42131		0.0843	3.50077	0.0295	4.4291	0.00246	2.71322	0.612588		0.000783	2.97542		1290	68.0379	29.5	1.30659	15.85	0.430045	15.82	0.470712	0.189633			10200	33.2	17500	93000	194000	21600	85000	19600	1030	1780	6860	795	1080	98	328	41
MA21_2_8	8	20405	43633			51.8	17910	43400	2.47158		0.0648	3.68504	0.0251	4.29067	0.002783	2.19781	0.512229		0.000862	2.39586		710	77.612	25.1	1.07696	17.92	0.393847	17.41	0.417119	2.92935			11180	24.1	24800	96500	220000	24500	95700	23500	813	2480	8950	977	1550	143	480	51.8
MA21_2_9	9	20401	43624			53.7	18070	45100	2.52016		0.0486	2.43206	0.01894	3.30463	0.002836	2.23733	0.67703		0.00087	2.46353		122	57.2256	19.05	0.629531	18.26	0.408537	17.58	0.433088	3.86803			9770	22.6	24800	99100	215000	24700	94900	22100	711	2430	8690	1021	1508	153	467	50.5
MA21_2_10	10	20396	43612			57	14700	46000	3.13381		0.051	2.36494	0.01976	3.20535	0.002847	2.16364	0.675009		0.000891	2.45361		223	54.5134	19.86	0.636583	18.33	0.396596	18	0.44165	1.83333			9760	20.1	26100	99100	216000	24300	97800	21500	774	2210	8360	1110	1671	156	504	55.9
MA21_2_11	11	20393	43596			65.6	13680	44700	3.3557		0.0521	2.39483	0.02365	3.15319	0.003264	2.0512	0.650514		0.001052	2.34966		291	54.7172	23.74	0.748567	21.01	0.430956	21.26	0.499538	1.17592			9980	22.8	28900	102400	211000	24800	93500	20800	1106	2200	9820	1191	1720	136.9	408	37.4
MA21_2_12	12	20394	43586			56.1	12000	41100	3.6324		0.0523	2.35254	0.0222	3.1204	0.003124	2.04998	0.656962		0.000993	2.26003		292	53.6669	22.3	0.695848	20.11	0.412251	20.06	0.453363	0.249252			9690	21.8	28400	102900	226000	26600	99200	21100	1016	2540	9560	1211	1650	125.8	380	42.4
MA21_2_13	13	20403	43588			51.3	11220	37200	3.60881		0.0553	2.47655	0.02339	3.23279	0.003082	2.07789	0.642755		0.00099	2.36984		422	55.2539	23.48	0.75906	19.84	0.412254	20	0.473969	0.8			8980	20.8	27700	106900	226000	26400	98700	22500	965	2440	9180	1209	1570	125	348	34.9
MA21_2_14	14	20402	43601			50.2	10540	32880	3.34448		0.0524	2.58362	0.02543	3.36728	0.003496	2.1595	0.64132		0.001105	2.27519		301	58.8925	25.5	0.858656	22.5	0.485888	22.33	0.508049	0.761308			9300	23.9	30800	102100	215000	25100	94200	19900	1191	2490	10150	1316	1750	139	371	41
MA21_2_15	15	20412	43604			48.9	12530	33800	3.125		0.0524	2.47034	0.02346	3.18731	0.003258	2.01404	0.631893		0.00103	2.39741		292	56.3103	23.54	0.750293	20.97	0.422344	20.8	0.498661	0.817308			8920	18	27300	98600	200900	24800	90000	19900	920	2270	9030	1163	1562	127.4	348	39.7
MA21_2_16	16	20406	43613			43.6	11400	32400	3.31895		0.0536	2.3802	0.02192	3.1576	0.002968	2.07487	0.657103		0.000953	2.3386		355	53.762	22.02	0.695305	19.1	0.396301	19.26	0.450414	0.830737			9340	17.2	26200	95300	209000	24600	95700	19200	803	2040	8000	1042	1670	159	476	53
MA21_2_17	17	20411	43619			37.1	13600	29070	2.49563		0.0518	2.43777	0.02069	3.17471	0.002889	2.03374	0.640606		0.000913	2.28141		267	55.8306	20.8	0.660341	18.6	0.378276	18.45	0.42092	0.813008			9790	17.1	23400	105600	211000	24400	97100	20600	737	2280	8260	1016	1580	150.6	487	55.6
																																				108921	228156	26390.6	98288.1	20741.6	1246.09	1890.38	7198.75	894.188	1414.28	139.581	453.438	53.0281
																																				0.367	0.957	0.137	0.711	0.231	0.087	0.058	0.381	0.085	0.249	0.036	0.248	0.038
																																				296787	238408	192632	138239	89790.3	14322.9	32592.7	18894.4	10519.9	5679.84	3877.26	1828.38	1395.48
MA26_1_1	1	49552	23501			32.96	6100	25810	5.16262		0.0854	2.45974	0.03293	3.21148	0.002767	2.06478	0.642937		0.000891	2.28792		1324	47.6364	32.89	1.05626	17.81	0.367738	18	0.411825	1.05556			9960	57.8	21700	107800	214000	25800	101500	20200	3870	2040	7480	949	1320	122.6	351	34.1
MA26_1_2	2	49552	23516			31.25	6570	24570	4.54959		0.0813	2.48838	0.03082	3.2123	0.002749	2.03146	0.6324		0.000891	2.31232		1216	48.852	30.82	0.990029	17.7	0.359568	18	0.416217	1.66667			9610	60.1	20900	102000	214000	25500	92600	20300	3640	2010	7660	910	1318	111.8	352	31.4
MA26_1_3	3	49554	23534			31.58	5690	24920	5.23286		0.0867	2.37953	0.03341	3.08476	0.002802	1.96306	0.636373		0.0008991	2.2338		1345	45.8955	33.37	1.02938	18.04	0.354136	18.17	0.405882	0.715465			11070	70.2	23500	105600	231000	27500	97600	22000	4090	2240	8840	1002	1431	122.5	380	35.1
MA26_1_4	4	49555	23549			34.1	5740	24570	5.05561		0.1689	2.47813	0.0734	3.24107	0.003122	2.08888	0.644503		0.000977	2.28654		2562	41.5216	71.9	2.33033	20.09	0.419656	19.73	0.451134	1.82463			10640	71.3	22700	109200	220000	25400	98200	20700	3970	2070	7950	950	1347	123	366	35.3
MA26_1_5	5	49556	23566			29.65	5460	23450	4.93827		0.0868	2.40303	0.0335	3.19005	0.002778	2.09807	0.65769		0.000899	2.30972		1367	46.3346	33.5	1.06867	17.88	0.375134	18.17	0.419677	1.59604			9550	70.1	20670	96200	221000	23500	88200	20600	3690	1960	7790	899	1321	117.7	324	34.5
MA26_1_6	6	49560	23579			40.28	6890	29470	4.83559		0.1614	2.49279	0.0706	3.35018	0.003208	2.23824	0.668095		0.000983	2.39362		2466	42.0854	69.3	2.32167	20.64	0.461972	19.86	0.475372	3.92749			11790	182	13530	106100	216700	25800	94200	22000	4110	1810	5560	626	829	72.8	212	22.3
MA26_1_7	7	49568	23595			30.92	6240	22650	4.0016		0.1143	2.25328	0.04779	3.05116	0.00298	2.05725	0.674253		0.000961	2.291		1865	40.6522	47.4	1.44625	19.18	0.394581	19.41	0.444684	1.18496			11300	148	20700	102500	214000	25100	96800	21500	4310	2350	8350	876	1291	116.7	346	35.9
MA26_1_8	8	49567	23500			31	5060	20840	4.45434		0.2	3.70675	0.095	4.52506	0.00338	2.59541	0.573564		0.001036	2.62598		2810	60.4975	92	4.16305	21.77	0.565021	20.93	0.549617	4.01338			11640	117	19600	101500	204000	23900	88600	19700	3890	2340	8230	960	1260	103.8	317	32.7
MA26_1_9	9	49568	23514			48.6	7610	35100	4.91159		0.1355	2.18856	0.0597	2.9842	0.003182	2.02871	0.679815		0.00098	2.30793		2167	38.1352	58.85	1.7562	20.48	0.415479	19.79	0.456739	3.48661			13090	402	4640	115500	229000	27900	98700	21100	4560	1361	2790	180	201	14.2	40.1	4.14
MA26_1_10	10	49568	23532			34.7	5600	24740	4.68823		0.1321	2.48844	0.0577	3.21598	0.003174	2.03721	0.633465		0.000983	2.30705		2123	43.5745	56.9	1.82989	20.43	0.416203	19.85	0.45795	2.92191			11200	331	6400	119000	235000	28100	107400	23300	4260	1360	2980	273	352	27.6	83	8.8
MA26_1_11	11	49571	23547			32.4	4720	23130	5.13875		0.158	3.08315	0.0724	3.81227	0.003228	2.24222	0.588159		0.000987	2.41324		2400	52.2424	70.8	2.69908	20.78	0.465933	19.95	0.481441	4.1604			10700	249	12500	106700	214000	24900	98500	21500	4210	1580	4520	507	720	62	187	18.8
MA26_1_12	12	49574	23566			32.18	4910	22180	4.68165		0.1501	2.61488	0.0697	3.38281	0.003322	2.14612	0.634419		0.001022	2.3173		2344	44.7083	68.4	2.31385	21.38	0.458841	20.65	0.478522	3.53511			9580	364	2640	116500	234000	27200	102200	21500	4490	1120	1770	90.2	89.2	4.26	13.9	1.46
MA26_1_13	13	49581	23579			33.37	5080	23310	4.78469		0.141	2.27044	0.0636	3.04616	0.003241	2.03081	0.666679		0.001016	2.2762		2241	39.265	62.6	1.9069	20.86	0.423627	20.52	0.467077	1.65692			9620	380	2790	112500	229000	26700	105200	21600	4540	1115	1930	105	91	5.31	14.2	1.56
MA26_1_14	14	49583	23594			39.5	6140	28700	4.90196		0.1368	2.2993	0.0593	3.05299	0.003147	2.00847	0.65787		0.000976	2.33119		2182	39.9916	58.5	1.786	20.26	0.406916	19.71	0.459477	2.79046			13100	391	5720	109900	227000	27400	105400	22000	4660	1438	3010	242	295	23.9	68.5	7.9
MA26_1_15	15	49588	23607			28.47	4440	22010	5.18941		0.1013	2.4097	0.0399	3.18732	0.002872	2.08624	0.654543		0.000912	2.3056		1640	44.6847	39.72	1.266	18.49	0.385746	18.42	0.424691	0.380022			10370	105.7	20500	102500	213000	22700	94700	18900	3660	2130	7740	907	1325	110.8	357	38.7
MA26_1_16	16	49601	23617			23.11	3740	17680	4.91642		0.1431	2.51292	0.0597	3.21963	0.003014	2.01277	0.625156		0.000933	2.27574		2274	43.3393	58.8	1.89314	19.4	0.390478	18.84	0.428749	2.9724			10210	95.4	21100	101200	215000	24100	92100	19700	3810	2030	7750	910	1338	118.5	308	35.3
MA26_1_17	17	49598	23640			12.89	1929	8330	4.48229		0.2148	2.53096	0.1002	3.34835	0.003393	2.19219	0.654708		0.001119	2.40568		2940	40.8871	96.9	3.24455	21.83	0.478556	22.6	0.543684	3.40708			10590	197	13100	102000	215000	24900	91200	18200	3750	1610	5190	542	781	64.7	195	22.8
MA26_1_18	18	49586	23628			32.05	5010	25070	5.22466		0.1154	2.38041	0.0456	3.14427	0.002857	2.05428	0.653342		0.000897	2.38165		1893	42.8568	45.2	1.42121	18.39	0.377782	18.12	0.431554	1.49007			9880	204	10700	120800	236000	29400	101800	21300	4160	1551	4710	505	734	72.6	234	25.8
MA26_2_1	1	43384	39037			26.48	5580	21150	3.79363		0.082	2.50774	0.0318	3.30205	0.002783	2.1482	0.650565		0.000889	2.3611		1242	49.1136	31.8	1.05005	17.92	0.384957	17.97	0.42429	0.278242			8090	84	20300	113600	247000	27600	103300	21600	4120	1940	7510	937	1371	119	388	37.2
MA26_2_2	2	43392	39045			25.08	5670	18730	3.25415		0.128	2.8569	0.0523	3.58389	0.002957	2.16388	0.603779		0.00096	2.31391		2058	50.3396	51.8	1.85645	19.03	0.411786	19.39	0.448667	1.85663			7300	107.1	20300	108500	225000	26800	100700	21200	3880	2120	7950	867	1249	109.4	308	34.3
MA26_2_3	3	43369	39038			32.37	6480	23060	3.4662		0.1217	2.35388	0.0524	3.14236	0.003117	2.08175	0.66248		0.000998	2.30274		1981	41.905	51.9	1.63089	20.06	0.4176	20.16	0.464232	0.496032			7250	297	3440	116800	239000	28200	106000	21400	4300	1215	2240	142	136	7.47	24.7	2
MA26_2_4	4	43387	39058			30.92	7300	21990	2.92056		0.1268	2.33414	0.0527	3.1424	0.003059	2.10391	0.669525		0.000998	2.30274		2048	41.2062	52.1	1.63719	19.69	0.41426	20.16	0.464232	2.33135			7460	215	9260	118100	250000	27700	105200	21900	4420	1651	4190	403	535	45	144	16.3
MA26_2_5	5	43385	39072			30.56	7090	21780	2.99222		0.1211	2.44234	0.0515	3.19639	0.003084	2.06201	0.645105		0.000996	2.30331		1964	43.5245	51	1.63016	19.85	0.409308	20.12	0.463425	1.34195			6480	218	4860	117500	249000	27900	106400	23000	4400	1330	2780	193	200	15.3	43.1	3.92
MA26_2_6	6	43385	39087			31.01	7320	22400	2.97354		0.1114	2.37985	0.0467	3.18425	0.003027	2.11559	0.664393		0.001001	2.34489		1823	43.1786	46.3	1.47431	19.49	0.412329	20.21	0.473902	3.56259			7230	255	3820	120100	246000	27600	113600	23100	4570	1320	2450	143	139	8.1	16.2	2.43
MA26_2_7	7	43380	39098			32.96	7810	23670	2.95858		0.1184	2.295	0.0507	3.07447	0.003088	2.04581	0.665419		0.000984	2.30676		1941	41.093	50.2	1.54338	19.88	0.406707	19.88	0.458584	0			6830	326	3270	120800	246000	27700	112900	22000	4460	1201	2290	126.3	125.4	6.48	17.7	2.09
MA26_2_8	8	43369	39114			28.27	9250	24540	2.59875		0.0899	2.60759	0.03052	3.36415	0.002457	2.12556	0.631826		0.000813	2.34009		1406	49.8144	30.52	1.02674	15.82	0.336263	16.42	0.384243	3.65408			7930	78.1	19200	108500	231000	26500	100600	21700	3240	1830	6760	797	1340	120.5	386	41.7
MA26_2_9	9	43365	39157			32.3	8250	23050	2.75786		0.1181	2.18269	0.04919	2.98343	0.003048	2.03389	0.68173		0.000995	2.30359		1925	39.103	48.76	1.45472	19.62	0.39905	20.1	0.463022	2.38806			6360	304	4470	118200	246000	28900	112500	22100	4400	1321	2400	167	161	10.8	30.9	2.72
MA26_2_10	10	43372	39149			34	8220	22970	2.78552		0.145	2.82818	0.0633	3.57452	0.003177	2.18599	0.611549		0.001038	2.47375		2272	48.6584	62.2	2.22335	20.44	0.446817	20.98	0.518994	2.57388			7020	411	3650	125400	251000	29400	116800	23400	4570	1322	2260	127.9	128.8	6.62	18.4	2
MA26_2_11	11	43373	39139			29.68	6900	20610	2.99581		0.1475	2.78969	0.0649	3.75775	0.00319	2.51759	0.669974		0.001033	2.51462		2330	47.8471	63.8	2.39744	20.56	0.517617	20.86	0.52455	1.43816			7790	425	3730	128400	251000	28500	115500	23200	4850	1309	2200	135.4	124.6	6.7	20.3	1.81
MA26_2_12	12	43365	39142			24.56	5600	17250	3.10945		0.1242	2.46131	0.0556	3.20723	0.003213	2.05629	0.64114		0.001022	2.29609		2016	43.6343	54.9	1.76077	20.68	0.42524	20.64	0.473912	0.193798			6500	379	3390	118500	231800	28900	105200	22000	4280	1196	2020	125	115.2	5.55	16	1.7
MA26_2_13	13	43350	39131			26.78	6640	19940	3.05623		0.1029	2.46136	0.0425	3.18909	0.002946	2.02781	0.635858		0.000966	2.31209		1685	45.4738	42.3	1.34898	18.96	0.384472	19.52	0.45132	2.86885			8060	215	14200	116000	240000	27700	108200	21900	4170	1760	5470	586	862	73.5	208	23.2
MA26_2_14	14	43350	39142			25.13	6060	19700	3.36022		0.101	2.41128	0.039	3.17527	0.00283	2.06594	0.650633		0.000917	2.32759		1634	44.7457	38.9	1.23518	18.22	0.376414	18.53	0.431302	1.67296			8260	151	18400	116000	237000	27800	99300	21200	3820	1970	7200	788	1127	98	293	33
MA26_2_15	15	43350	39153			23.67	5540	18260	3.43053		0.1	2.45764	0.0397	3.21933	0.002859	2.07944	0.645924		0.000933	2.34532		1630	45.7148	39.5	1.27163	18.41	0.382825	18.85	0.442093	2.33422			7600	100.8	20200	103300	216000	25600	94500	19800	3720	1860	7120	820	1240	101	319	33.1
MA26_2_16	16	43350	39165			21.21	5060	17200	3.6049		0.1075	2.53037	0.0406	3.28377	0.002751	2.09293	0.637356		0.000894	2.31134		1745	46.2784	40.4	1.32664	17.71	0.370658	18.05	0.417196	1.88366			8370	126	16400	114100	233000	26700	104000	20400	3610	1690	5780	651	962	87.5	288	34.9
MA26_2_17	17	43359	39174			20.33	5060	17120	3.64564		0.0976	2.27744	0.03563	3.07937	0.002632	2.07263	0.673069		0.000855	2.34957		1574	42.6132	35.54	1.09441	16.94	0.351103	17.28	0.406005	1.96759			7940	113.3	14640	108300	237000	26700	98200	21100	3330	1667	5310	597	922	85.2	261	29.5
MA26_2_18	18	43355	39104			21.86	4220	17650	4.54959		0.0843	2.63008	0.0322	3.35913	0.002777	2.0896	0.622065		0.000888	2.28883		1291	51.116	32.2	1.08164	17.88	0.37362	17.93	0.410387	0.278862			8450	82.1	22200	117600	234000	27000	100800	20500	3990	2070	7370	882	1410	124.1	383	40.6
MA26_6_1	1	39278	34074			20.35	4940	18090	4.09836		0.0812	2.48911	0.02817	3.2173	0.002529	2.03846	0.633595		0.0008092	2.27192		1213	48.8833	28.2	0.907277	16.29	0.332065	16.35	0.37146	0.366972			8870	59.9	20900	112300	229000	28100	100700	21300	3920	1950	7680	961	1417	135	437	48.5
MA26_6_2	2	39276	34087			22.95	4920	19400	4.34405		0.092	2.59196	0.0342	3.28054	0.002687	2.0109	0.612977		0.000861	2.2973		1474	49.2212	34.2	1.12195	17.3	0.347885	17.4	0.39973	0.574713			8730	71.9	21700	103500	219000	24900	96100	20290	3780	2050	7530	865	1414	120.5	380	41.1
MA26_6_3	3	39284	34101			23.5	4540	18740	4.58295		0.0955	2.46317	0.0374	3.25961	0.002818	2.13491	0.654959		0.000906	2.30749		1528	46.3366	37.3	1.21584	18.14	0.387273	18.3	0.42227	0.874317			8510	87.8	21200	105700	220000	25400	94800	21200	3870	2250	7820	907	1305	113.2	333	36.5
MA26_6_4	4	39286	34119			22.77	4590	18130	4.33276		0.0967	2.39205	0.0384	3.1842	0.002881	2.10172	0.660047		0.000917	2.3509		1554	44.8596	38.3	1.21955	18.55	0.38987	18.53	0.435621	0.107933			7840	81.5	19600	102000	211000	25000	90500	19600	3600	2050	7530	827	1226	95.4	287	33.6
MA26_6_5	5	39272	34114			22.62	4550	18720	4.47828		0.0894	2.54634	0.0338	3.29867	0.00272	2.09699	0.635707		0.000873	2.31831		1408	48.7153	33.8	1.11495	17.51	0.367182	17.64	0.40895	0.736961			8610	73.8	20700	106000	215000	24500	97900	19900	3760	1962	7070	911	1321	121	361	39.9
MA26_6_6	6	39270	34133			21.8	5230	17400	3.56125		0.125	3.35261	0.0497	3.94751	0.002822	2.08396	0.527916		0.000925	2.4605		2030	59.3576	49.2	1.94218	18.17	0.378655	18.68	0.459621	2.73019			8770	107	18000	104600	213000	25900	93300	20900	4200	1920	6560	759	1135	105.7	346	38.7
MA26_6_7	7	39295	34143			24.35	4470	20040	4.77783		0.0916	2.59489	0.0356	3.30125	0.002824	2.04078	0.618185		0.00088	2.31595		1463	49.3319	35.5	1.17194	18.18	0.371014	17.77	0.411545	2.30726			8290	71	20200	109600	219000	25500	98300	19500	3590	1930	6980	840	1253	102.9	315	35.9
MA26_6_8	8	39271	34209			28.71	5120	18790	3.86847		0.339	2.65985	0.175	3.94712	0.00374	2.91633	0.738849		0.001171	3.14522		3659	40.6567	164	6.47328	24.1	0.702835	23.7	0.745417	1.68776			9340	76.2	18800	107800	221000	24600	94900	21600	3480	1810	7000	831	1275	110.7	398	45.7
MA26_6_9	9	39259	34189			13.6	2700	9800	3.70645		0.237	3.16086	0.109	3.87911	0.003185	2.24865	0.579681		0.001066	2.7843		3080	50.3872	101.6	3.94117	20.5	0.460972	21.54	0.599739	4.82823			9600	89	21600	105800	224000	24700	97400	20200	3800	2150	7450	846	1256	103	345	37.6
MA26_6_10	10	39271	34179			27.87	6130	22180	3.70782		0.124	2.9943	0.0501	3.68129	0.002889	2.14152	0.58173		0.000913	2.32892		1970	53.1007	49.6	1.82592	18.6	0.398322	18.44	0.429453	0.867679			8270	106	14800	121000	237000	27700	104500	20100	4130	1710	5590	609	970	82	250	27.2
MA26_6_11	11	39274	34170			28.88	6190	23070	3.82555		0.097	2.59714	0.0385	3.36777	0.002871	2.144	0.636622		0.00091	2.37663		1589	48.6688	38.7	1.30333	18.48	0.396211	18.38	0.436824	0.54407			8070	122	17100	117400	229000	25900	100100	21300	3780	1800	6260	740	1030	87	268	27.9
MA26_6_12	12	39273	34160			30.09	6670	23080	3.51741		0.1334	2.34283	0.0573	3.08147	0.003045	2.00165	0.649575		0.0009487	2.18873		2151	40.9467	56.6	1.74411	19.6	0.392323	19.17	0.41958	2.24309			8320	178	8550	112600	239000	29700	104100	21000	4000	1439	3560	332	457	34.4	110	12.4
MA26_6_13	13	39274	34151			31.98	7780	24430	3.17158		0.1349	2.44597	0.0561	3.20891	0.003019	2.07709	0.64729		0.000951	2.31667		2163	42.6569	55.4	1.77773	19.43	0.403579	19.21	0.445033	1.14524			8010	209	6260	124800	250000	28700	108400	23000	4480	1379	3120	256	330	25.3	81.4	7.9
MA26_6_14	14	39289	34189			32.4	9250	27270	2.9994		0.088	2.46595	0.0328	3.24119	0.002672	2.10343	0.648969		0.00086	2.37232		1371	47.374	32.8	1.06311	17.2	0.361791	17.38	0.412309	1.03567			9000	77	20600	109900	237000	27700	103400	20500	3830	2020	7500	898	1340	116.7	328	39.1
MA26_7_1	1	49395	36268			34.78	10740	30900	2.92826		0.0851	2.4855	0.0304	3.21443	0.002609	2.03835	0.634123		0.000824	2.33587		1325	48.1815	30.4	0.977187	16.8	0.342442	16.66	0.389157	0.840336			8820	59.9	18690	103600	215000	24800	96000	20300	3590	1970	6830	838	1273	121.1	394	45.4
MA26_7_2	2	49389	36284			42.2	10450	31000	3.0012		0.1301	2.28877	0.0561	3.08368	0.003187	2.06655	0.670156		0.000998	2.34585		2094	40.1986	55.5	1.71144	20.51	0.423848	20.17	0.473158	1.68567			8880	246	6490	122400	248000	26900	110000	22300	4320	1417	3210	263	351	22.5	77	8
MA26_7_3	3	49401	36321			64.8	10320	30030	2.94551		0.435	2.58617	0.328	3.76036	0.00548	2.72984	0.725952		0.001564	2.9657		4032	38.5837	288	10.8298	35.2	0.960905	31.6	0.937162	11.3924			7890	247	3460	123900	247000	28500	115300	23200	4340	1166	2060	115.7	114	8	21.3	2.81
MA26_7_4	4	49409	36329			50.4	11140	34800	3.14564		0.198	3.04969	0.0958	3.82314	0.003504	2.3056	0.603065		0.00106	2.46485		2790	49.8474	92.7	3.54405	22.55	0.519913	21.42	0.52797	5.27544			9030	287	2860	128800	250000	28800	107300	23200	4420	1123	1933	107.5	99.5	4.25	13.4	1.48
MA26_7_5	5	49371	36339			33.3	9420	29200	3.10174		0.189	3.34313	0.0709	4.09244	0.002685	2.36042	0.576775		0.000814	2.49225		2710	55.0264	69.4	2.84015	17.28	0.40788	16.44	0.409726	5.10949			9310	57.8	19600	117400	228000	26500	103400	22100	3170	1930	7230	838	1294	122.5	396	47.6
MA26_7_6	6	49403	36355			14.83	4030	11460	2.88184		0.267	2.78108	0.1084	3.66972	0.00292	2.39426	0.652436		0.000948	2.55571		3295	43.6707	104.3	3.82752	18.79	0.449881	19.15	0.489418	1.8799			9370	65.2	17000	105600	233000	24800	104000	20600	3240	1640	6350	719	1112	102.7	366	43.6
MA26_7_7	7	49387	36367	Off target?																										#DIV/0!
MA26_7_8	8	49380	36353			17.38	4140	11340	2.74574		0.408	2.53501	0.1973	3.48672	0.00352	2.39393	0.686587		0.001087	2.54635		3935	38.0438	182.8	6.37372	22.67	0.542704	21.96	0.559179	3.23315			8800	62.9	13900	95500	206000	22900	96200	20300	3520	1620	5620	619	947	99.9	487	88
MA26_7_9	9	49417	36346			33.88	10190	31200	3.05623		0.1067	2.53506	0.0363	3.26324	0.002477	2.05481	0.629684		0.000781	2.38003		1731	46.4431	36.2	1.18129	15.95	0.327743	15.78	0.375568	1.07731			9180	43.4	18300	102300	210000	25400	95800	19600	3270	1710	6740	798	1343	120.1	425	47.4
MA26_7_10	10	49378	36314			38.7	9700	29900	3.07409		0.107	2.36145	0.0441	3.13182	0.002981	2.05714	0.656852		0.000941	2.31981		1756	43.2348	43.8	1.37174	19.19	0.394765	19.02	0.441227	0.893796			7770	122.5	11800	111500	235000	26600	109300	21500	4210	1630	4660	463	636	53.6	146	15.5
MA26_7_11	11	49383	36295			39.13	9490	31150	3.26904		0.1068	2.4211	0.0433	3.23728	0.002951	2.14901	0.663832		0.000914	2.37511		1752	44.3459	43	1.39203	18.99	0.408096	18.47	0.438682	2.81538			9490	100.3	19300	112900	230000	26700	107200	21600	4040	1860	6660	790	1071	93.7	280	31
MA26_7_12	12	49384	36331			38.8	9280	28810	3.09215		0.1342	2.41827	0.0568	3.19169	0.003106	2.08298	0.652627		0.000974	2.33182		2152	42.2162	56.1	1.79054	19.99	0.416388	19.68	0.458902	1.5752			8260	99.2	18000	107300	226000	25600	94500	20900	3960	1980	6680	734	1012	83.8	233	25.3
MA26_8_1	1	44601	42282			31.16	8580	25540	2.94811		0.0901	2.33661	0.0342	3.16953	0.002771	2.14153	0.675662		0.000887	2.36185		1439	44.6119	34.2	1.08398	17.84	0.382048	17.93	0.42348	0.501952			7480	52.8	20700	110700	220000	28000	102800	21100	3740	1939	7150	853	1345	115.2	364	42.8
MA26_8_2	2	44591	42289			32.7	7550	26980	3.53607		0.0832	2.59337	0.0321	3.31589	0.002827	2.06629	0.623148		0.000887	2.33787		1279	50.5853	32	1.06109	18.2	0.376065	17.91	0.418712	1.61921			7700	47.8	21700	108200	224000	25600	102900	21300	3790	1940	7300	865	1301	118.4	343	41.4
MA26_8_3	3	44598	42312			31.9	8010	23740	2.936		0.1109	2.36315	0.0465	3.21081	0.003052	2.17367	0.676986		0.000984	2.28463		1808	42.9183	46.3	1.48661	19.64	0.42691	19.88	0.454183	1.20724			5990	113.3	4130	117400	240000	27100	106800	21200	4320	1258	2430	151.7	155	10.1	23.9	2.62
MA26_8_4	4	44601	42321			30.9	7480	23170	3.07409		0.1073	2.43777	0.0453	3.18972	0.003056	2.05709	0.644912		0.000966	2.3783		1754	44.6036	45	1.43537	19.67	0.40463	19.51	0.464006	0.820092			5650	120.6	4270	126100	246000	28600	112400	21600	4520	1302	2400	153.6	139.6	8.04	18.8	2.07
MA26_8_5	5	44606	42329			34.27	7280	23140	3.13578		0.1926	2.38334	0.0916	3.16157	0.003438	2.07732	0.657052		0.001087	2.31947		2766	39.1167	89	2.8138	22.13	0.45971	21.95	0.509124	0.820046			6050	143.3	3940	124500	259000	28000	105400	22260	4390	1253	2270	140	128	7.04	20.1	2.04
MA26_8_6	6	44606	42387			25.08	5680	17280	2.94985		0.188	3.01514	0.0847	3.79807	0.003273	2.3096	0.608098		0.001047	2.5274		2754	49.668	82.4	3.12961	21.07	0.486632	21.15	0.534546	0.378251			7280	55	21400	109300	236000	24800	99000	21000	3490	2030	7670	863	1251	107.7	339	37.3
MA26_8_7	7	44600	42376			29.9	8920	25990	2.86451		0.0953	2.85864	0.0337	3.58204	0.0026	2.15853	0.602596		0.000838	2.40624		1535	53.804	33.6	1.20357	16.74	0.361337	16.94	0.407617	1.18064			7800	42.4	20700	110000	232000	27400	100800	20600	3720	2010	7340	851	1313	118.7	388	38.8
MA26_8_8	8	44594	42366			28.81	8160	24760	2.9753		0.1333	2.48309	0.049	3.26054	0.002666	2.11315	0.648097		0.000854	2.34995		2155	43.4043	48.6	1.58462	17.16	0.362616	17.25	0.405366	0.521739			8350	42.8	19500	108700	237000	27700	105300	20800	3420	1920	7000	830	1273	117	373	41.3
MA26_8_9	9	44592	42356			31.91	9650	27010	2.72702		0.0959	2.5028	0.0356	3.31406	0.002679	2.17234	0.65549		0.000868	2.4173		1543	47.0331	35.7	1.18312	17.25	0.374728	17.55	0.424235	1.7094			8060	47.4	21200	119200	228000	29000	102000	21300	4180	2050	7530	937	1320	122	367	39.2
MA26_8_10	10	44587	42346			31.95	9410	27230	2.8169		0.0787	2.37786	0.0286	3.16683	0.002627	2.09155	0.660455		0.000861	2.37192		1156	47.1182	28.63	0.906664	16.91	0.353681	17.4	0.412715	2.81609			7190	51.2	20800	102400	225000	25800	101600	21100	3900	1980	7080	849	1332	118.5	354	37.3
MA26_8_11	11	44601	42360			31.49	8500	26700	3.03398		0.0758	2.55698	0.02717	3.28691	0.002617	2.06534	0.628353		0.00086	2.29762		1084	51.2301	27.21	0.894368	16.85	0.348009	17.37	0.399097	2.99367			8420	57.1	20900	115000	228000	26800	98700	20600	3910	1880	7400	864	1275	111.6	347	37.5
MA26_8_12	12	44576	42321			31.99	8410	27540	3.1746		0.0805	2.49427	0.02886	3.26152	0.002621	2.10146	0.64432		0.000849	2.35185		1196	49.105	28.89	0.942253	16.88	0.354726	17.16	0.403578	1.6317			7680	54.4	21900	104700	224000	26800	100500	20800	3690	1840	7210	875	1283	112.6	354	40.2
MA26_8_13	13	44591	42319			34	6770	25600	3.69959		0.115	2.50669	0.0487	3.36296	0.003043	2.24189	0.66664		0.000969	2.42024		1878	45.1642	48.3	1.62431	19.58	0.438961	19.58	0.473884	0			6670	179	3860	117200	235000	27600	105100	21300	4350	1219	2340	146.2	139	8	20.3	2.54
MA26_13_1	1	40194	36680			40.6	5620	31840	5.51572		0.123	2.41695	0.0496	3.2578	0.002923	2.18441	0.670516		0.000943	2.36446		2002	42.9333	49.2	1.60284	18.82	0.411105	19.05	0.45043	1.20735			8560	181	11900	111500	230000	27400	108300	22300	4270	1590	4540	451	687	57.3	169	16.7
MA26_13_2	2	40185	36686			43.9	5840	31930	5.41126		0.1501	2.36046	0.0654	3.16069	0.003141	2.10195	0.665028		0.000991	2.34811		2354	40.3583	64.3	2.03232	20.22	0.425013	20.03	0.470327	0.948577			9230	319	4950	124300	252000	29300	110600	23200	4440	1255	2530	173	178	12.5	38	3.57
MA26_13_3	3	40173	36694			42.1	5920	30780	5.15464		0.1323	2.34682	0.0561	3.12978	0.003076	2.07073	0.661622		0.00099	2.32683		2130	41.0826	55.4	1.7339	19.8	0.410004	20	0.465366	1			8560	311	3470	115600	237000	28400	106400	21400	4330	1164	2090	134.1	129.2	7.16	19.3	1.87
MA26_13_4	4	40165	36700			37.4	5260	27070	5.14139		0.1344	2.29105	0.0576	3.13476	0.003081	2.13957	0.682532		0.001005	2.3857		2152	39.9838	56.8	1.78054	19.83	0.424277	20.3	0.484296	2.31527			8970	338	3500	118500	250000	27800	118700	22000	4430	1159	2050	127.9	122.1	8	20.9	2.01
MA26_13_5	5	40148	36698			33.74	4620	25560	5.54324		0.1394	2.94821	0.0568	3.7074	0.002959	2.24786	0.606318		0.000945	2.45165		2231	51.0955	56.1	2.07985	19.05	0.428218	19.09	0.46802	0.209534			9660	146	16050	109100	222000	24600	92000	20800	3850	1710	6010	670	960	83.8	253	25.4
MA26_13_6	6	40145	36712			28.68	5650	24970	4.41696		0.095	3.07417	0.032	3.88326	0.002446	2.37259	0.610978		0.000819	2.53811		1550	57.9063	31.9	1.23876	15.75	0.373682	16.56	0.420311	4.8913			10540	77.1	20200	103200	218000	25500	97900	20200	3710	1900	6820	842	1469	123.1	406	47
MA26_13_7	7	40162	36708			32.51	4700	23950	5.16609		0.1293	2.39058	0.0523	3.19438	0.002939	2.11877	0.663281		0.000965	2.35678		2089	42.0381	52	1.66108	18.92	0.400871	19.5	0.459572	2.97436			8590	268	5070	115400	231000	26700	103800	20500	4220	1161	2530	196	235	18.6	55.9	6.59
MA26_13_8	8	40178	36672			36.1	5180	26440	5.12295		0.1215	2.38938	0.0497	3.18587	0.002902	2.10729	0.661447		0.000968	2.37758		1979	42.5515	49.2	1.56745	18.68	0.393641	19.56	0.465055	4.49898			9200	263	6740	123100	250000	27500	105700	22200	4290	1301	2990	277	337	26.1	84.5	9.4
																														#DIV/0!

## Sheet: run order
Iolite	unknown	name	X	Y
1		44069_1	66036	33828
2		Stern_1	67445	33087
3		FC1_1	68886	33176
4		44069_2	66008	33797
5		Stern_2	67555	33022
6		FC1_2	68898	33176
7	1	MA06_2_1	47040	59427
8	2	MA06_2_2	47051	59435
9	3	MA06_2_3	47026	59433
10	4	MA06_2_4	47036	59441
11	5	MA06_2_5	47047	59453
12	6	MA06_2_6	46980	59416
13	7	MA06_2_7	46998	59427
14	8	MA06_2_8	47014	59446
15	9	MA06_2_9	47030	59461
16	10	MA06_2_10	47034	59479
17		44069_3	65990	33804
18		Stern_3	67461	33059
19	11	MA06_2_11	47023	59492
20	12	MA06_2_12	47016	59477
21	13	MA06_2_13	47008	59466
22	14	MA06_2_14	46996	59450
23	15	MA06_2_15	46985	59440
24	16	MA06_2_16	46971	59430
25	17	MA06_2_17	46959	59419
26	18	MA06_2_18	46944	59429
27	19	MA06_2_19	46954	59438
28	20	MA06_2_20	46968	59451
29		44069_4	65906	33946
30		Stern_4	67473	33131
31	21	MA06_2_21	46981	59462
32	22	MA06_2_22	46992	59473
33	23	MA06_2_23	47003	59485
34	24	MA06_2_24	47013	59497
35	25	MA06_2_25	47004	59505
36	26	MA06_2_26	46991	59500
37	27	MA06_2_27	46979	59495
38	28	MA06_2_28	46966	59487
39	29	MA06_2_29	46959	59473
40	30	MA06_2_30	46952	59461
41		44069_5	65954	33941
42		Stern_5	67436	33117
43		FC1_3	68895	33164
44	31	MA06_2_31	46941	59444
45	32	MA06_2_32	46968	59468
46	33	MA06_2_33	46981	59479
47	34	MA06_2_34	46991	59488
48	35	MA06_2_35	47017	59457
49	36	MA06_2_36	47011	59436
50	37	MA06_2_37	46999	59439
51	38	MA06_2_38	47024	59448
52	39	MA06_2_39	46996	59462
53	40	MA06_2_40	46983	59429
54		44069_6	65941	33932
55		Stern_6	67453	32995
56	41	MA06_2_41	46971	59443
57	42	MA06_2_42	46982	59453
58	43	MA06_2_43	47038	59453
59	44	MA06_2_44	47025	59470
60	45	MA06_2_45	46956	59451
61	46	MA06_2_46	46969	59419
62	47	MA06_2_47	46991	59417
63		44069_7	65964	33987
64		Stern_7	67414	33023
65	48	MA06_1_1	43516	55402
66	49	MA06_1_2	43514	55416
67	50	MA06_1_3	43512	55430
68	51	MA06_1_4	43509	55444
69	52	MA06_1_5	43507	55461
70	53	MA06_1_6	43508	55478
71	54	MA06_1_7	43509	55495
72	55	MA06_1_8	43511	55512
73	56	MA06_1_9	43523	55518
74	57	MA06_1_10	43534	55504
75		44069_8	65897	34024
76		Stern_8	67447	33063
77		FC1_4	68875	33200
78	58	MA06_1_11	43538	55488
79	59	MA06_1_12	43542	55466
80	60	MA06_1_13	43546	55441
81	61	MA06_1_14	43543	55420
82	62	MA06_1_15	43538	55404
83	63	MA06_1_16	43526	55414
84	64	MA06_1_17	43526	55429
85	65	MA06_1_18	43525	55444
86	66	MA06_1_19	43524	55459
87	67	MA06_1_20	43523	55474
88		44069_9	65881	33995
89		Stern_9	67442	33164
90	68	MA06_1_21	43523	55489
91	69	MA06_1_22	43522	55504
92	70	MA06_1_23	43550	55410
93	71	MA06_1_24	43561	55423
94	72	MA06_1_25	43572	55437
95	73	MA06_1_26	43558	55439
96	74	MA06_28_1	40126	74414
97	75	MA06_28_2	40139	74413
98	76	MA06_28_3	40151	74422
99	77	MA06_28_4	40161	74437
100	78	MA06_28_5	40124	74431
101	79	MA06_28_6	40123	74482
102	80	MA06_28_7	40138	74485
103	81	MA06_28_8	40123	74492
104	82	MA06_28_9	40125	74442
105	83	MA06_28_10	40136	74439
106		44069_10	65897	33956
107		Stern_10	67383	33057
108		FC1_5	68874	33187
109	84	MA06_28_11	40148	74440
110	85	MA06_28_12	40147	74452
111	86	MA06_28_13	40136	74456
112	87	MA06_28_14	40126	74455
113	88	MA06_28_15	40134	74465
114	89	MA11_1_1	20106	87260
115	90	MA11_1_2	20103	87249
116	91	MA11_1_3	20095	87240
117	92	MA11_1_4	20121	87236
118	93	MA11_1_5	20133	87244
119	94	MA11_1_6	20114	87146
120	95	MA11_1_7	20108	87129
121	96	MA11_1_8	20108	87116
122	97	MA11_1_9	20056	87103
123	98	MA11_1_10	20057	87120
124		44069_11	65909	33934
125		Stern_11	67815	33069
126	99	MA11_1_11	20058	87137
127	100	MA11_1_12	20143	86998
128	101	MA11_1_13	20174	86986
129	102	MA11_1_14	20127	87016
130	103	MA11_1_15	20117	87034
131	104	MA11_1_16	20106	87060
132	105	MA11_1_17	20103	87089
133	106	MA11_1_18	20091	87114
134	107	MA11_1_19	20089	87144
135	108	MA11_1_20	20098	87176
136		44069_12	65875	33983
137		Stern_12	67735	33186
138		FC1_6	68861	33177
139	109	MA11_1_21	20104	87196
140	110	MA11_1_22	20128	87209
141	111	MA11_1_23	20094	87208
142	112	MA11_1_24	20079	87163
143	113	MA11_1_25	20077	87126
144	114	MA11_1_26	20083	87098
145	115	MA11_1_27	20094	87040
146	116	MA11_1_28	20108	87016
147	117	MA11_1_29	20141	87029
148	118	MA11_1_30	20133	87054
149	119	MA11_1_31	20123	87170
150		44069_13	65911	33961
151		Stern_13	67767	33213
152	120	MA11_7_1	15520	88216
153	121	MA11_7_2	15509	88217
154	122	MA11_7_3	15494	88218
155	123	MA11_7_4	15479	88218
156	124	MA11_7_5	15471	88227
157	125	MA11_7_6	15483	88228
158	126	MA11_7_7	15496	88230
159	127	MA11_7_8	15514	88227
160	128	MA11_7_9	15493	88242
161	129	MA11_7_10	15483	88240
162		44069_14	65863	33966
163		Stern_14	67796	33201
164		FC1_7	68884	33187
165	130	MA11_7_11	15464	88241
166	131	MA11_7_12	15461	88254
167	132	MA11_7_13	15462	88266
168	133	MA11_7_14	15468	88274
169	134	MA11_7_15	15479	88273
170	135	MA11_7_16	15486	88264
171	136	MA11_7_17	15492	88254
172	137	MA11_7_18	15481	88251
173	138	MA11_7_19	15472	88249
174	139	MA11_7_20	15473	88262
175		44069_15	65868	33991
176		Stern_15	67710	33235
177	140	MA11_5_1	15104	88131
178	141	MA11_5_2	15116	88131
179	142	MA11_5_3	15128	88133
180	143	MA11_5_4	15138	88139
181	144	MA11_5_5	15145	88148
182	145	MA11_5_6	15144	88157
183	146	MA11_5_7	15138	88167
184	147	MA11_5_8	15134	88180
185	148	MA11_5_9	15126	88198
186	149	MA11_5_10	15117	88195
187		44069_16	65877	33972
188		Stern_16	67810	33100
189	150	MA11_5_11	15109	88187
190	151	MA11_5_12	15104	88179
191	152	MA11_5_13	15113	88141
192	153	MA11_5_14	15117	88150
193	154	MA11_5_15	15120	88158
194	155	MA11_5_16	15126	88152
195	156	MA11_5_17	15124	88166
196	157	MA11_5_18	15123	88144
197		44069_17	65874	33956
198		Stern_17	67455	33200
199		FC1_8	68896	33187
200	158	MA11_8_1	6051	74970
201	159	MA11_8_2	6042	74973
202	160	MA11_8_3	6021	74948
203	161	MA11_8_4	6015	74958
204	162	MA11_8_5	6041	74964
205	163	MA11_8_6	6042	74955
206	164	MA11_8_7	6036	74948
207	165	MA11_8_8	6002	74927
208	166	MA11_8_9	5989	74946
209	167	MA11_8_10	6025	74957
210	168	MA11_8_11	6012	74950
211	169	MA11_8_12	6006	74970
212		44069_18	65896	33996
213		Stern_18	67719	33203
214	170	MA11_26_1	12340	71060
215	171	MA11_26_2	12341	71072
216	172	MA11_26_3	12341	71087
217	173	MA11_26_4	12341	71103
218	174	MA11_26_5	12335	71117
219	175	MA11_26_6	12330	71132
220	176	MA11_26_7	12320	71134
221	177	MA11_26_8	12311	71127
222	178	MA11_26_9	12301	71121
223	179	MA11_26_10	12297	71112
224		44069_19	65896	34009
225		Stern_19	67705	33222
226		FC1_9	68872	33176
227	180	MA11_26_11	12305	71102
228	181	MA11_26_12	12315	71090
229	182	MA11_26_13	12325	71080
230	183	MA11_26_14	12330	71067
231	184	MA11_26_15	12330	71093
232	185	MA11_26_16	12324	71102
233	186	MA11_26_17	12314	71111
234	187	MA11_26_18	12323	71117
235		44069_20	65884	34006
236		Stern_20	67694	33207
237	188	MA11_22_1	20532	89356
238	189	MA11_22_2	20526	89366
239	190	MA11_22_3	20535	89373
240	191	MA11_22_4	20533	89383
241	192	MA11_22_5	20588	89408
242	193	MA11_22_6	20588	89396
243	194	MA11_22_7	20601	89399
244	195	MA11_22_8	20599	89411
245	196	MA11_22_9	20612	89413
246	197	MA11_22_10	20614	89400
247		44069_21	65921	34046
248		Stern_21	67736	33030
249		FC1_10	68839	33200
250	198	MA11_22_11	20664	89416
251	199	MA11_22_12	20655	89419
252	200	MA11_22_13	20643	89421
253	201	MA11_22_14	20535	89281
254	202	MA11_22_15	20540	89293
255	203	MA11_22_16	20543	89306
256	204	MA11_22_17	20558	89311
257	205	MA11_22_18	20556	89297
258	206	MA11_22_19	20549	89282
259	207	MA11_22_20	20561	89278
260		44069_22	65927	33927
261		Stern_22	67664	33014
262	208	MA11_22_21	20570	89291
263	209	MA11_22_22	20570	89303
264	210	MA11_22_23	20571	89315
265	211	MA11_22_24	20598	89216
266	212	MA11_22_25	20610	89210
267	213	MA11_22_26	20613	89191
268	214	MA11_22_27	20622	89179
269	215	MA11_33_1	15390	83345
270	216	MA11_33_2	15383	83352
271	217	MA11_33_3	15368	83363
272		44069_23	65887	33985
273		Stern_23	67689	33129
274		FC1_11	68838	33188
275	218	MA11_33_4	15354	83368
276	219	MA11_33_5	15341	83373
277	220	MA11_33_6	15351	83359
278	221	MA11_33_7	15362	83353
279	222	MA11_33_8	15371	83348
280	223	MA11_33_9	15381	83340
281	224	MA11_33_10	15377	83331
282	225	MA11_33_11	15368	83336
283	226	MA11_33_12	15357	83342
284		44069_24	65898	33938
285		Stern_24	67438	33177
286		44069_24 (Copy)	66145	34223
287		Stern_24 (Copy)	67705	33323
288	227	MA21_3_1	19515	28736
289	228	MA21_3_2	19520	28747
290	229	MA21_3_3	19527	28733
291	230	MA21_3_4	19530	28744
292	231	MA21_3_5	19533	28756
293	232	MA21_3_6	19525	28752
294	233	MA21_3_7	19557	28759
295	234	MA21_3_8	19545	28761
296	235	MA21_3_9	19539	28735
297	236	MA21_3_10	19547	28743
298	237	MA21_3_11	19540	28746
299		44069_25	66133	34246
300		Stern_25	67644	33173
301		FC1_12	68851	33200
302	238	MA21_4_1	18664	27381
303	239	MA21_4_2	18668	27390
304	240	MA21_4_3	18670	27400
305	241	MA21_4_4	18670	27412
306	242	MA21_4_5	18670	27425
307	243	MA21_4_6	18665	27430
308	244	MA21_4_7	18657	27426
309	245	MA21_4_8	18651	27418
310	246	MA21_4_9	18656	27411
311	247	MA21_4_10	18663	27421
312	248	MA21_4_11	18661	27402
313	249	MA21_4_12	18658	27393
314	250	MA21_4_13	18654	27385
315	251	MA21_4_14	18644	27383
316	252	MA21_4_15	18646	27393
317		44069_26	66063	34140
318		Stern_26	67717	33044
319	253	MA21_9_1	20090	30219
320	254	MA21_9_2	20100	30223
321	255	MA21_9_3	20110	30226
322	256	MA21_9_4	20117	30234
323	257	MA21_9_5	20119	30242
324	258	MA21_9_6	20118	30252
325	259	MA21_9_7	20117	30263
326	260	MA21_9_8	20112	30271
327	261	MA21_9_9	20103	30272
328	262	MA21_9_10	20093	30271
329		44069_27	66094	34231
330		Stern_27	67641	33090
331		FC1_13	68848	33187
332	263	MA21_9_11	20096	30263
333	264	MA21_9_12	20094	30255
334	265	MA21_9_13	20087	30251
335	266	MA21_9_14	20078	30248
336	267	MA21_9_15	20080	30239
337	268	MA21_9_16	20083	30229
338	269	MA21_9_17	20092	30231
339	270	MA21_9_18	20103	30234
340	271	MA21_9_19	20109	30243
341	272	MA21_9_20	20110	30251
342	273	MA21_9_21	20107	30260
343	274	MA21_9_22	20102	30251
344	275	MA21_9_23	20099	30243
345	276	MA21_9_24	20090	30241
346		44069_28	66085	34151
347		Stern_28	67688	33100
348	277	MA21_2_1	20397	43578
349	278	MA21_2_2	20411	43579
350	279	MA21_2_3	20415	43590
351	280	MA21_2_4	20421	43601
352	281	MA21_2_5	20422	43612
353	282	MA21_2_6	20421	43622
354	283	MA21_2_7	20414	43632
355	284	MA21_2_8	20405	43633
356	285	MA21_2_9	20401	43624
357	286	MA21_2_10	20396	43612
358		44069_29	66036	34221
359		Stern_29	67603	33178
360	287	MA21_2_11	20393	43596
361	288	MA21_2_12	20394	43586
362	289	MA21_2_13	20403	43588
363	290	MA21_2_14	20402	43601
364	291	MA21_2_15	20412	43604
365	292	MA21_2_16	20406	43613
366	293	MA21_2_17	20411	43619
367		44069_30	65856	34110
368		Stern_30	67629	33116
369		FC1_14	68860	33188
370	294	MA26_1_1	49552	23501
371	295	MA26_1_2	49552	23516
372	296	MA26_1_3	49554	23534
373	297	MA26_1_4	49555	23549
374	298	MA26_1_5	49556	23566
375	299	MA26_1_6	49560	23579
376	300	MA26_1_7	49568	23595
377	301	MA26_1_8	49567	23500
378	302	MA26_1_9	49568	23514
379	303	MA26_1_10	49568	23532
380		44069_31	66077	34192
381		Stern_31	67705	33021
382	304	MA26_1_11	49571	23547
383	305	MA26_1_12	49574	23566
384	306	MA26_1_13	49581	23579
385	307	MA26_1_14	49583	23594
386	308	MA26_1_15	49588	23607
387	309	MA26_1_16	49601	23617
388	310	MA26_1_17	49598	23640
389	311	MA26_1_18	49586	23628
390		44069_32	65960	34128
391		Stern_32	67606	33025
392		FC1_15	68862	33199
393	312	MA26_2_1	43384	39037
394	313	MA26_2_2	43392	39045
395	314	MA26_2_3	43369	39038
396	315	MA26_2_4	43387	39058
397	316	MA26_2_5	43385	39072
398	317	MA26_2_6	43385	39087
399	318	MA26_2_7	43380	39098
400	319	MA26_2_8	43369	39114
401	320	MA26_2_9	43365	39157
402	321	MA26_2_10	43372	39149
403		44069_33	66097	34166
404		Stern_33	67640	33053
405	322	MA26_2_11	43373	39139
406	323	MA26_2_12	43365	39142
407	324	MA26_2_13	43350	39131
408	325	MA26_2_14	43350	39142
409	326	MA26_2_15	43350	39153
410	327	MA26_2_16	43350	39165
411	328	MA26_2_17	43359	39174
412	329	MA26_2_18	43355	39104
413		44069_34	65949	34112
414		Stern_34	67601	33106
415	330	MA26_6_1	39278	34074
416	331	MA26_6_2	39276	34087
417	332	MA26_6_3	39284	34101
418	333	MA26_6_4	39286	34119
419	334	MA26_6_5	39272	34114
420	335	MA26_6_6	39270	34133
421	336	MA26_6_7	39295	34143
422	337	MA26_6_8	39271	34209
423	338	MA26_6_9	39259	34189
424	339	MA26_6_10	39271	34179
425	340	MA26_6_11	39274	34170
426	341	MA26_6_12	39273	34160
427	342	MA26_6_13	39274	34151
428	343	MA26_6_14	39289	34189
429		44069_35	66115	34190
430		Stern_35	67585	33121
431		FC1_16	68839	33177
432	344	MA26_7_1	49395	36268
433	345	MA26_7_2	49389	36284
434	346	MA26_7_3	49401	36321
435	347	MA26_7_4	49409	36329
436	348	MA26_7_5	49371	36339
437	349	MA26_7_6	49403	36355
438	350	MA26_7_7	49387	36367
439	351	MA26_7_8	49380	36353
440	352	MA26_7_9	49417	36346
441	353	MA26_7_10	49378	36314
442	354	MA26_7_11	49383	36295
443	355	MA26_7_12	49384	36331
444		44069_36	66094	34187
445		Stern_36	67618	32968
446	356	MA26_8_1	44601	42282
447	357	MA26_8_2	44591	42289
448	358	MA26_8_3	44598	42312
449	359	MA26_8_4	44601	42321
450	360	MA26_8_5	44606	42329
451	361	MA26_8_6	44606	42387
452	362	MA26_8_7	44600	42376
453	363	MA26_8_8	44594	42366
454	364	MA26_8_9	44592	42356
455	365	MA26_8_10	44587	42346
456	366	MA26_8_11	44601	42360
457	367	MA26_8_12	44576	42321
458	368	MA26_8_13	44591	42319
459		44069_37	66046	34130
460		Stern_37	67565	32998
461		FC1_17	68838	33164
462	369	MA26_13_1	40194	36680
463	370	MA26_13_2	40185	36686
464	371	MA26_13_3	40173	36694
465	372	MA26_13_4	40165	36700
466	373	MA26_13_5	40148	36698
467	374	MA26_13_6	40145	36712
468	375	MA26_13_7	40162	36708
469	376	MA26_13_8	40178	36672
470		44069_38	65940	34098
471		Stern_38	67580	33025
483		44069_39	65914	34091
484		Stern_39	67585	33042
485		FC1_18	68851	33176
496		44069_40	65865	34173
497		Stern_40	67592	32960
508		44069_41	65840	34127
509		Stern_41	67583	32975
510		FC1_19	68848	33164
521		44069_42	65889	34107
522		Stern_42	67502	32958
533		44069_43	65894	34089
534		Stern_43	67548	32960
535		FC1_20	68860	33164
546		44069_44	66012	34120
547		Stern_44	67484	32980
548		FC1_21	68884	33164
549		FC1_22	68873	33164
